26 **Abstract**

27 Regulation of fungal cell wall biosynthesis is critical to maintain cell wall integrity in the face  
28 of dynamic fungal infection microenvironments. In this study, we observe that a yeast *ssd1*  
29 homolog, *ssdA*, in the filamentous fungus *Aspergillus fumigatus* is involved in trehalose and  
30 cell wall homeostasis. An *ssdA* null mutant strain exhibited an increase in trehalose levels and  
31 a reduction in colony growth rate. Over-expression of *ssdA* in contrast perturbed trehalose  
32 biosynthesis and reduced conidia germination rates. The *ssdA* null mutant strain was more  
33 resistant to cell wall perturbing agents while over-expression of *ssdA* promoted increased  
34 sensitivity. Over-expression of *ssdA* significantly increased chitin levels and both loss and  
35 over-expression of *ssdA* altered sub-cellular localization of the class V chitin synthase CsmA.  
36 Strikingly, over-expression of *ssdA* abolished adherence to abiotic surfaces and severely  
37 attenuated the virulence of *A. fumigatus* in a murine model of invasive pulmonary  
38 aspergillosis. In contrast, despite the severe *in vitro* fitness defects observed upon loss of  
39 *ssdA*, neither surface adherence or murine survival was impacted. In conclusion, *A. fumigatus*  
40 SsdA plays a critical role in cell wall homeostasis that alters fungal-host interactions.

41

42

43

44

45

46

47

48

49

## 50 **Importance**

51 Life threatening infections caused by the filamentous fungus *Aspergillus fumigatus* are  
52 increasing along with a rise in fungal strains resistant to contemporary antifungal therapies.  
53 The fungal cell wall and the associated carbohydrates required for its synthesis and  
54 maintenance are attractive drug targets given that many genes encoding proteins involved in  
55 cell wall biosynthesis and integrity are absent in humans. Importantly, genes and associated  
56 cell wall biosynthesis and homeostasis regulatory pathways remain to be fully defined in *A.*  
57 *fumigatus*. In this study, we identify SsdA, a model yeast Ssd1p homolog, as an important  
58 component of trehalose and fungal cell wall biosynthesis in *A. fumigatus* that consequently  
59 impacts fungal virulence in animal models of infection.

60

61

62

63

64

65

66

67

68

69

70

71

72

73

## 74 **Introduction**

75 *Aspergillus fumigatus* is the most common filamentous fungus that causes a wide  
76 variety of human diseases ranging from allergic type diseases to acute invasive infections.  
77 Invasive aspergillosis (IA) in immune compromised hosts, e.g. patients with hematological  
78 malignancies and organ or stem cell transplant recipients is associated with high mortality  
79 (1). Antifungal drugs used to treat IA, e.g. voriconazole, amphotericin B, are associated with  
80 undesired side effects, detrimental drug-drug interactions, long therapeutic regimens, and  
81 persistence of poor patient outcomes (2-5). To compound the difficulty of treating these  
82 infections, the emergence of azole-resistant *Aspergillus* infections is increasing globally (6-  
83 28). In order to make therapeutic advances against these increasingly common and potentially  
84 drug resistant infections, new antifungal drugs are needed.

85 One existing antifungal drug target that has not been fully exploited is the fungal cell  
86 wall. Consisting mainly of polysaccharides including  $\beta$ -1,3-glucans, alpha-glucans, mannan,  
87 chitin, and galactosaminogalactan among others (29-38), the cell wall is a great antifungal  
88 drug target as evidenced by the development of the echinocandins that target  $\beta$ -1,3-glucan  
89 biosynthesis. Interestingly, the carbohydrates needed to generate  $\beta$ -1,3-glucan and chitin, i.e.  
90 glucose 6-phosphate and UDP-glucose, are also important substrates used to generate  
91 trehalose, a disaccharide sugar, that is important for fungal conidia germination, stress  
92 protection, cell wall homeostasis, and virulence (39, 40). The canonical trehalose  
93 biosynthesis pathway in *A. fumigatus* consists of two enzymes, TpsA/B (trehalose-6-  
94 phosphate synthase) and Or1A (trehalose-6-phosphate phosphatase), and two regulatory-like  
95 subunits, TslA and TslB (39-41). Trehalose biosynthesis is also found in other organisms in  
96 addition to fungi including bacteria, plants, and insects, but is not found in humans (42).

97 We and others previously observed that proteins involved in trehalose biosynthesis  
98 impact cell wall homeostasis in *A. fumigatus* (39-41). Disruption of the trehalose-6-phosphate



99 phosphatase, OrlA, leads to perturbations in cell wall integrity as observed by the increased  
100 sensitivity to the cell wall perturbing agents congo red, calcofluor white, and nikkomycin Z  
101 (40). Loss of OrlA attenuates virulence of *A. fumigatus* in chronic granulomatous disease  
102 (xCGD) and chemotherapeutic invasive pulmonary aspergillosis (IPA) murine models. In  
103 addition, a regulatory subunit of the trehalose biosynthesis pathway, TslA, is critical for  
104 trehalose production and cell wall homeostasis in part through regulation of a class V chitin  
105 synthase enzyme, ChsE/CsmA (41). Loss of TslA increased chitin production and altered the  
106 sub-cellular localization of CsmA (41). Pulldown assays with TslA as bait identified a  
107 physical interaction between TslA and CsmA as well as a putative *Saccharomyces cerevisiae*  
108 Ssd1 homolog, herein called SsdA.

109 Ssd1p is a pleiotropic RNA-binding protein (43, 44) that is important for chromosome  
110 stability at high temperature, vesicular trafficking, stress responses, and cell wall integrity in  
111 *S. cerevisiae* (45-49). Ssd1p genetically interacts with Pkc1p and Sit4p, which are important  
112 components of the cell wall integrity signaling pathway (48). It has been shown that *S.*  
113 *cerevisiae* *ssd1* null mutants isolated from both patients and plants are more virulent than  
114 wild type strains in a DBA/2 murine model (50). Similar to the *A. fumigatus* *tslA* null mutant,  
115 the cell wall composition of yeast *ssd1* null mutants contain more chitin and mannan with  
116 decreases in  $\beta$ -1,3-glucan and  $\beta$ -1,6-glucan (50). These cell wall changes lead to increased  
117 proinflammatory responses against *ssd1* mutant strains (50). In contrast to *S. cerevisiae*, the  
118 *ssdA/ssdA* null mutant in *C. albicans* has decreased virulence in the invasive systemic  
119 candidiasis murine model (51). In filamentous fungal pathogens, the function of Ssd1  
120 homologs is less clear, but in the plant pathogen *Magnaporthe grisea*, *SSD1* is important for  
121 fungal colonization of rice leaves (52). The authors suggested that *SSD1* is essential for  
122 proper cell wall assembly leading to evasion of the host immune response (52). However, the  
123 mechanism(s) behind this phenotype is not well understood (52). In this study, we

124 characterized a predicted Ssd1p homolog identified in *A. fumigatus* through its protein-  
125 protein interaction with the trehalose biosynthesis protein, TslA. Using a genetics approach,  
126 we observe that *A. fumigatus* SsdA is critical for cell wall biosynthesis, trehalose production,  
127 polarized growth, biofilm formation, and virulence of *A. fumigatus*. Our results support the  
128 known role of Ssd1 homologs in fungal cell wall biosynthesis and highlight the potential  
129 altered functions of *A. fumigatus* *ssdA* including those involved in trehalose biosynthesis,  
130 biofilm formation, and fungal virulence.

131

## 132 **Results**

### 133 **SsdA regulates trehalose production and is required for *Aspergillus fumigatus* conidia** 134 **germination and mycelium expansion**

135 AFUB\_010850 was identified in a mass-spectrometry based screen of proteins that interact  
136 with the trehalose biosynthesis regulatory protein, TslA (41). Protein domain analysis of  
137 AFUB\_010850 revealed strong amino acid sequence similarity with the nucleic acid binding  
138 Interpro domain IPR012340 ( $5.0E^{-109}$ ) and the ribonuclease (RNB) PFAM domain PF00773  
139 ( $4.4E^{-88}$ ). BLASTP analysis of the AFUB\_010850 amino acid sequence against the  
140 *Saccharomyces cerevisiae* genome database revealed strong sequence similarity to the  
141 protein SSD1p. Consequently, reciprocal BLASTP analyses with SSD1p against the *A.*  
142 *fumigatus* genome suggested AFUB\_010850 is likely an Ssd1p ortholog and hence we named  
143 AFUB\_010850 *ssdA*. Given the previously identified roles of TslA in trehalose and cell wall  
144 homeostasis in *A. fumigatus*, and the known roles of *ssd1* homologs in fungal cell wall  
145 biosynthesis, we hypothesized that SsdA is an important mediator of trehalose production and  
146 cell wall homeostasis in *A. fumigatus*.

147 To test this hypothesis, we generated *ssdA* null mutant ( $\Delta ssdA$ ) and over-expression  
148 strains (OE:*ssdA*) (confirmed by PCR and Southern blot analyses). The *ssdA* null mutant was

149 complemented with an *ssdA::GFP* allele. We next measured the trehalose content of both  
150 conidia and mycelia in the respective strains (53). We observed increased trehalose content in  
151  $\Delta ssdA$  conidia and mycelia and conversely reduced trehalose levels in OE:*ssdA* ( $P=0.0004$ ,  
152 compared  $\Delta ssdA$  to the wild type;  $P<0.0001$  compared OE:*ssdA* to the wild type) (**Fig. 1A**).  
153 Reconstitution of  $\Delta ssdA$  with *ssdA::GFP* restored wild-type trehalose levels. These data  
154 suggest that SsdA plays a role in regulating trehalose biosynthesis and/or levels in *A.*  
155 *fumigatus*.

156 To determine if *ssdA* plays a role in conidia germination and polarized growth, we  
157 measured radial growth of the respective strains' fungal mycelium on solid medium (**Fig. 1B**,  
158 **C**) and liquid planktonic culture biomass (**Fig. 1D**) in 1% glucose minimal medium (GMM).  
159 We observed that on solid GMM both the  $\Delta ssdA$  and OE:*ssdA* strains exhibited decreased  
160 mycelial radial growth after a 72-hour incubation at 37°C compared to the wild type and  
161 reconstituted strains ( $\Delta ssdA+ssdA::GFP$ ) ( $P<0.0001$   $\Delta ssdA$  to the wild type and  $P=0.0001$   
162 OE:*ssdA* to the wild type) (**Fig. 1B, C**). In planktonic liquid cultures, 24-hour biomass from  
163  $\Delta ssdA$  and OE:*ssdA* cultures grown at 37°C was reduced compared to the wild-type and  
164 reconstituted strains ( $P=0.0133$   $\Delta ssdA$  to the wild type and  $P=0.0023$  OE:*ssdA* to the wild  
165 type) (**Fig. 1D**).  $\Delta ssdA$  conidia germinated faster in the first 6-8 hours ( $P<0.01$ ,  $\Delta ssdA$  to the  
166 wild type) while OE:*ssdA* conidia germinated slower during the first 12 hours and then  
167 caught up to the wild type at 24 hours ( $P<0.0001$ , OE:*ssdA* to the wild type) (**Fig. 1E**). The  
168 reduced germination observed in OE:*ssdA* conidia is consistent with the reduction in  
169 trehalose levels in these fungal cells as Al-Bader, *et al.* observed that depletion of trehalose  
170 content in an *A. fumigatus tpsA/tpsB* double null mutant deficient in trehalose delayed conidia  
171 germination (39). However, *A. fumigatus* trehalose mutants do not have *in vitro* growth  
172 defects when glucose is the primary carbon source and we cannot attribute *ssdA* mutant  
173 growth defects to alterations in trehalose levels. Taken together, these results implicate SsdA

174 in trehalose biosynthesis and support a global role for SsdA in fungal fitness when glucose is  
175 the sole carbon source.

176

### 177 **SsdA is important for cell wall integrity**

178 *A. fumigatus* trehalose null mutants including  $\Delta tslA$  have altered cell wall integrity and  
179 previous research identified a link between yeast Ssd1p and *Neurospora crassa* GUL-1  
180 (SSD1 homolog) function and the cell wall (39, 40, 50, 54). We next utilized the cell wall  
181 perturbing agents congo red (1 mg/mL), calcofluor white (CFW, 50  $\mu$ g/mL), and the  
182 echinocandin caspofungin (2  $\mu$ g/mL) to test the hypothesis that *A. fumigatus* SsdA is  
183 important for cell wall integrity.  $\Delta ssdA$  exhibited increased resistance to cell wall perturbing  
184 agents while OE:*ssdA* exhibited increased susceptibility, particularly to congo red and  
185 calcofluor white (**Fig. 2**).

186 We hypothesized that the altered growth and change in susceptibility to cell wall  
187 perturbing agents observed in SsdA mutants comes from altered cell wall composition and/or  
188 organization. To initially test this hypothesis, CFW and wheat germ agglutinin (WGA) were  
189 used to interrogate total and exposed chitin respectively, while soluble human dectin-1-FC  
190 was used to examine  $\beta$ -1,3-glucan exposure. We observed a large decrease in the intensity of  
191 CFW and WGA staining of  $\Delta ssdA$  germlings while in contrast germlings of OE:*ssdA* showed  
192 increased intensity with these chitin binding molecules ( $P=0.0322$ ,  $\Delta ssdA$  to the wild type,  
193  $P<0.0001$ , OE:*ssdA* to the wild type) (**Fig. 3A**). For  $\beta$ -1,3-glucan, we observed a decrease in  
194 soluble dectin1-FC staining on both the  $\Delta ssdA$  and the OE:*ssdA* germlings suggestive of a  
195 decrease in  $\beta$ -1,3-glucan exposure ( $P=0.0389$ ,  $\Delta ssdA$  to the wild type,  $P<0.0001$ , OE:*ssdA*  
196 to the wild type) (**Fig. 3**). While additional quantitative cell wall composition analyses are  
197 needed, these data support the hypothesis that SsdA impacts *A. fumigatus* cell wall integrity.

198           Given the changes in the cell wall of the  $\Delta ssdA$  and the OE:*ssdA* strains, we next  
199 tested their ability to adhere to an abiotic surface. Using the crystal violet adherence assay,  
200 we observed no difference in adherence between the wild-type,  $\Delta ssdA$ , and reconstituted  
201 strains. However, a striking loss of adherence was observed in the OE:*ssdA* strain (**Fig. 4A**).  
202 To investigate this adherence difference further, spinning disk confocal microscopy, in  
203 combination with the galactosaminogalactan binding FITC labeled soy bean agglutinin  
204 (SBA), was utilized. Given the decreased adherence of the overexpression strain, we were  
205 surprised that increased expression of *ssdA* resulted in much greater levels of SBA staining,  
206 revealing striking differences compared to the wild-type and  $\Delta ssdA$  strains (**Fig. 4B**). As SBA  
207 binds to oligosaccharides with alpha- or beta-linked N-acetylgalactosamine and, to a lesser  
208 extent, galactose residues, we tested whether mRNA levels of the UDP-glucose 4-epimerase  
209 involved in galactosaminogalactan biosynthesis were altered in the *ssdA* mutant strains (55).  
210 No significant difference in *uge3* mRNA levels were observed under the conditions  
211 examined, suggesting a role for *ssdA* in post-transcriptional regulation of the  
212 galactosaminogalactan polysaccharide (**Fig. 4C**). Taken together, these data suggest that *ssdA*  
213 expression levels impact fungal adherence.

214           Given the responses of the *ssdA* mutant strains to agents and reagents that inhibit or  
215 bind to chitin, a non-radioactive chitin synthase activity assay was next utilized to further  
216 define the impact of SsdA levels on the *A. fumigatus* cell wall (56, 57). Consistent with the  
217 cell wall immunohistochemistry results, chitin synthase activity in  $\Delta ssdA$  was significantly  
218 reduced while in contrast chitin synthase activity in OE:*ssdA* was significantly increased  
219 ( $P=0.0029$ ,  $\Delta csmA$  to the wild type;  $P=0.0208$ ,  $\Delta ssdA$  to the wild type;  $P<0.0001$ , OE:*ssdA*  
220 to the wild type) (**Fig. 5A**). We previously observed that activity and localization of the chitin  
221 synthase CsmA was perturbed by loss of the trehalose regulatory protein TslA (41). As TslA

222 was found to also physically interact with SsdA, we hypothesized that SsdA levels may also  
223 impact CsmA sub-cellular localization.

224 To study CsmA sub-cellular localization when SsdA levels are altered, we introduced  
225 a C-terminal GFP-tagged *csmA* allele into the respective *ssdA* mutant strains. Using spinning  
226 disk confocal microscopy, we observed that alteration of *ssdA* mRNA levels (loss or  
227 increase) led to an altered CsmA localization pattern compared to the wild-type and  
228 reconstituted strains (**Fig. 5B**). CsmA:GFP puncta observed in  $\Delta$ *ssdA* are mainly focused at  
229 the hyphal tip with a few puncta also localized along the lateral hyphal walls but no visible  
230 localization at the conidial septum. In contrast, in OE:*ssdA* CsmA:GFP puncta were  
231 dispersed throughout the hyphae with no visible puncta at the hyphal tip or conidial septum  
232 (**Fig. 5B**). Intriguingly, this latter result is similar to the diffuse sub-cellular localization of  
233 CsmA:GFP in the absence of TslA (41). Taken together, these results suggest SsdA levels  
234 affect sub-cellular localization of the chitin synthase CsmA.

235

### 236 **SsdA levels are critical for *Aspergillus fumigatus* virulence**

237 Given the trehalose, cell wall, and biofilm phenotypes associated with alterations in SsdA  
238 levels, we hypothesized that SsdA plays an important role in *A. fumigatus* fungal-host  
239 interactions. To understand the importance of SsdA in the *A. fumigatus*-host interaction, we  
240 first utilized the triamcinolone (steroid) murine model of IPA (58). Strikingly, we observed  
241 that overexpression of SsdA significantly decreased *A. fumigatus* virulence compared to the  
242 wild type ( $P= 0.0033$ , OE:*ssdA* to the wild type) (**Fig. 6A**). This reduction in virulence was  
243 associated with a large reduction in immune cell infiltrate in the bronchoalveolar lavage fluid  
244 (BALs) ( $P=0.0159$ , OE:*ssdA* to the wild type, Mann-Whitney *t*-test) (**Fig. 6B**). Perhaps  
245 correspondingly, we observed a significant reduction in fungal growth within the OE:*ssdA*  
246 inoculated lungs compared to other strains (**Fig. 6C**).

247 In contrast, complete loss of SsdA did not alter median murine survival time between  
248 the wild type and  $\Delta ssdA$  (median survival = 3 days). However, despite the *in vitro* growth  
249 defect of  $\Delta ssdA$ , fungal burden observed by histopathology revealed modest increases in  
250  $\Delta ssdA$  fungal burden at day three post inoculation compared to wild-type (**Fig. 6C**).  
251 Surprisingly, despite equivalent or increased fungal burden compared to the wild type, a  
252 significant reduction in immune cell infiltrate in the bronchoalveolar lavage fluid (BALs) is  
253 apparent in animals inoculated with  $\Delta ssdA$  ( $P=0.0159$ ,  $\Delta ssdA$  to the wild type, Mann-  
254 Whitney *t*-test) (**Fig. 6C**). These results support the hypothesis that changes in *ssdA* levels  
255 impact the fitness of *A. fumigatus in vivo* and alter host immune responses.

256 Given the striking  $\Delta ssdA$  *in vitro* growth defect observed but full virulence (as  
257 measured by murine mortality) in the steroid IPA model, we hypothesized that SsdA would  
258 be essential for virulence in a leukopenic IPA model with significant immune cell depletion  
259 (41). However, surprisingly, and similar to the corticosteroid model,  $\Delta ssdA$  also had  
260 persistent if not slightly increased virulence in the leukopenic model ( $P = 0.005$ ) (**Fig. 6D**).  
261 Also similar to the steroid model, OE:*ssdA* had significant virulence attenuation compared to  
262 the wild type ( $P = 0.0049$ ) (**Fig. 6D**). Median survival of the wild type,  $\Delta ssdA$ , and OE:*ssdA*-  
263 inoculated mice was 3.5, 2, and 9.5 days, respectively. Histopathology from this leukopenic  
264 model revealed less fungal growth from lungs of OE:*ssdA*-inoculated mice while  $\Delta ssdA$ -  
265 inoculated mice, in contrast to the *in vitro* growth phenotype, had substantial invasive hyphal  
266 growth compared to the wild type (**Fig. 6F**). In contrast to the steroid model, inflammatory  
267 cell infiltrations were the same between *ssdA* mutants and the wild type in this leukopenic  
268 model possibly reflecting the significant chemical mediated immune suppression (**Fig. 6E**).  
269 These results suggest that increased *ssdA* mRNA levels attenuate *A. fumigatus* virulence  
270 likely through fungal fitness defects while loss of SsdA alters the host immune response and  
271 modestly increases fungal virulence *in vivo*.



272

## 273 **Discussion**

274           The cell wall of *Aspergillus fumigatus* consists of polysaccharides including chitin,  $\beta$ -  
275 glucan, galactosaminogalactan, and others that are critical for fungal fitness in diverse  
276 environments including those associated with pathogenesis (29-38). Cell wall homeostasis  
277 and integrity are critical for the synthesis of each cell wall component in the face of stress  
278 and affect fungal pathogenesis on multiple levels (59). Another carbohydrate produced by  
279 fungi, trehalose, is also critical for fungal fitness during environmental stress including  
280 pathogenesis (42, 60). Previous research in multiple fungi has revealed an unexpected and ill-  
281 defined link between cell wall homeostasis and the biosynthesis of the disaccharide sugar  
282 trehalose (39-41). In *A. fumigatus*, a physical interaction between the TslA trehalose  
283 biosynthesis regulatory sub-unit and CsmA, a class V chitin synthase, suggested that  
284 trehalose biosynthesis proteins have direct roles in coordinating trehalose and fungal cell wall  
285 biosynthesis (41). Coordination between these 2 biological processes is logical given that  
286 both biosynthetic pathways utilize common carbohydrate metabolic intermediates.  
287 Intriguingly in our previous study, TslA was observed to physically interact with a protein  
288 (SsdA) that here we define as a homolog of the *S. cerevisiae* translational repressor protein  
289 Ssd1p. Alterations in the levels of SsdA in *A. fumigatus* impact both trehalose levels and cell  
290 wall integrity. Thus, these data further support the hypothesis that trehalose and cell wall  
291 biosynthesis are coordinated and implicate a new potential regulatory protein SsdA in these  
292 processes in *A. fumigatus*.

293           How physical interactions between TslA, SsdA, and CsmA in *A. fumigatus* mediate  
294 chitin and trehalose biosynthesis remains unclear. In *S. cerevisiae*, Ssd1p is a unique RNA-  
295 binding protein associated with multiple biological processes (43, 44) including stress  
296 tolerance, membrane trafficking, cell cycle, posttranslational modifications, mini-



297 chromosome stability, and cell wall integrity (45-47, 61). With regard to a regulatory role in  
298 cell wall biosynthesis in yeast, Hogan, *et al.* (2008) showed that mRNA transcripts associated  
299 with Ssd1 encoded proteins related to cell-wall biosynthesis, cell-wall remodeling and  
300 regulation, cell cycle, and protein trafficking (44). Loss of ScSsd1p from both human and  
301 plant yeast isolates impacted cell wall composition by increasing both chitin and mannan  
302 content while decreasing  $\beta$ -1,3-glucan (50). Intriguingly, these results in yeast are opposite to  
303 those observed here in *A. fumigatus* where SsdA loss appears to decrease chitin content while  
304 overexpression of SsdA increased chitin. However, additional cell wall composition  
305 biochemical assays are needed to define the impact of SsdA on cell wall composition.

306 Ssd1 homologs are also associated with cell wall integrity in the human pathogenic  
307 yeast *Cryptococcus neoformans* though a *ssd1* loss of function strain displayed only modest  
308 susceptibility to cell wall perturbing agents in this pathogenic yeast (62). However, a Ssd1  
309 homolog in the human pathogenic yeast *Candida albicans* is associated with cell wall  
310 integrity and virulence. Increased expression of *CaSSD1* is associated with antimicrobial  
311 peptide resistance, while *ssd1* deletion mutants exhibit decreased virulence in an invasive  
312 candidiasis murine model (51). Intriguingly, *CaSsd1p* physically interacts with *CaCbk1p*, an  
313 NDR kinase (Nuclear Dbf2-related), which is important for hyphal morphogenesis, the RAM  
314 pathway (Regulation of Ace2 and Morphogenesis), polarized growth, cell proliferation,  
315 apoptosis, and cell wall biosynthesis (63, 64). *CaSsd1p* has nine *CaCbk1p* phosphorylation  
316 consensus motifs. *CaCbk1p* is essential for Ssd1p localization to polarized growth areas (63).  
317 Moreover, in the filamentous fungus *Neurospora crassa*, a *gul-1* (Ssd1 homolog) mutant is  
318 able to partially suppress the severe fitness defect of a *cot-1* (Cbk1 homolog) temperature  
319 sensitive mutant and this is associated with a reduction in transcript levels of cell wall  
320 homeostasis genes including chitin synthases and the beta 1,3 glucan synthase *fks1* (54, 65).

321

322           The putative *A. fumigatus* Cbk1 homolog (AFUB\_068890) is uncharacterized, but the  
323   corresponding homolog in *A. nidulans*, CotA, is a conditionally essential gene and it is  
324   unclear if it plays a direct role in cell wall or trehalose biosynthesis (66-68). However, loss of  
325   *A. nidulans cotA* phenotypes can be suppressed by osmotic stabilization perhaps suggesting  
326   an important role for this kinase in cell wall biosynthesis in *Aspergillus* spp (68). Future  
327   experiments with *cotA* loss and/or gain of function mutants in *A. fumigatus* may reveal if this  
328   important kinase plays a role in chitin synthase regulation and whether this role is mediated  
329   by TslA and/or SsdA. Additional domain specific mutations in TslA/SsdA and/or genetic  
330   screens may also help reveal the mechanistic relationship(s) behind the TslA-SsdA protein-  
331   protein interaction and chitin biosynthesis.

332           Importantly for human fungal pathogenesis, our results suggest *A. fumigatus* SsdA  
333   plays a role virulence. Clinical and plant yeast isolates with null mutations in *Scssd1*  
334   have increased virulence in a DBA/2 murine infection model (50). *Scssd1* null mutants  
335   induced more pro-inflammatory cytokine production perhaps consistent with alterations in  
336   cell wall composition in *Ssd1* mutants (50). In the fungal plant pathogens *Colletotrichum*  
337   *lagenarium* and *Magnaporthe oryzae*, *SSD1* is also important for pathogenesis (52). It was  
338   hypothesized that *SSD1* supported plant infection by evading induction of the plant immune  
339   response (52). Interestingly, in *A. fumigatus* the loss of SsdA resulted in virulence similar to  
340   wild-type strain as measured by murine mortality in both the corticosteroid and leukopenic  
341   murine IPA models despite the *in vitro* colony and planktonic growth defects associated with  
342   *ssdA* loss. In fact, in both murine models loss of *ssdA* appeared to promote *in vivo* fungal  
343   growth but intriguingly reduced the host immune response. In contrast, overexpression of  
344   SsdA severely attenuated virulence and we observed significantly less fungal growth in the  
345   OE:*ssdA*-inoculated lungs suggesting that loss of virulence in this strain may be due to poor  
346   *in vivo* fitness. The extreme adherence defect of OE:*ssdA* may contribute to this loss of *in*

347 *in vivo* fungal burden and virulence, but we cannot rule out other mechanisms impacted by  
348 increased *SsdA* levels. For example, the significant delay in conidia *in vitro* germination  
349 observed in the OE:*ssdA* strain may also manifest *in vivo* and give the host immune system  
350 additional time to clear the fungus. Perhaps consistent with altered cell wall composition and  
351 PAMP exposure, both *ssdA* and OE:*ssdA*-inoculated BALF had decreased inflammatory cell  
352 infiltration, particularly neutrophils, and how these alterations in the host inflammatory  
353 response mediated infection outcomes in the presence and absence of *SsdA* require further  
354 investigation.

355         In conclusion, we identified a critical role for *A. fumigatus* *SsdA* in cell wall  
356 homeostasis, trehalose production, and virulence. *SsdA* is involved in regulation of chitin  
357 biosynthesis and/or homeostasis in this fungus, however, the mechanisms of this regulation  
358 are still unclear and further investigation is needed to fully understand the roles and  
359 mechanisms of *SsdA* in *A. fumigatus* cell wall integrity and fungal-host interactions. While  
360 there is a clear conservation of a role for *SsdA* homologs in cell wall homeostasis in many  
361 fungi, these data in *A. fumigatus* provide another example of altered wiring/functions of key  
362 master regulatory genes in pathogenic fungi compared to model organisms. It will also be  
363 interesting and important to explore the regulation and function of these pathways within  
364 fungal species to identify broadly conserved mechanisms for potential therapeutic  
365 development.

366

## 367 **Materials and methods**

### 368 **Fungal strains, media, and growth conditions**

369 *Aspergillus fumigatus* strain CEA17 strain (a uracil auxotroph strain lacking *pyrG* gene) was  
370 used to generate the *ssdA* null mutant (69). A *ku80* strain (a uracil auxotroph strain lacking  
371 *pyrG* and *akuB* genes) was used to generate S-tagged and Flag-tagged strains for pulldown

372 assays and co-immunoprecipitation experiments (69, 70). Glucose minimal media (GMM)  
373 containing 1% glucose were used to grow the mutants along with a wild type, CEA10  
374 (CBS144.89) at 37°C with 5% CO<sub>2</sub> if not stated otherwise (71). The conidia from each strain  
375 were collected in 0.01% Tween-80 after 72-hour incubation at 37°C with 5% CO<sub>2</sub>. Fresh  
376 conidia were used in all experiments.

377

### 378 **Strain construction and fungal transformation**

379 Gene replacements and reconstituted strains were generated as previously described (40, 58).  
380 PCR and Southern blot were used to confirm the mutant strains (40). Real-time reverse  
381 transcriptase PCR was used to confirm expression of the re-introduced gene and  
382 overexpressed strain (72). To generate the single-null mutant, *A. parasiticus pyrG* from  
383 pJW24 was used as a selectable marker (73). To generate reconstituted strains of single null  
384 mutants, we utilized a *ptrA* marker, which is a pyrithiamine resistance gene from *A. oryzae*  
385 (74). To generate GFP-tagged strains, we utilized a *hygB* marker, which is a hygromycin B  
386 phosphotransferase gene as a hygromycin resistant marker (75). For S-tagged strains, an S-  
387 tag coding sequence along with *AfpypyrG* was introduced to the C-terminus of proteins of  
388 interest, i.e. TslA (76, 77). For co-immunoprecipitation experiments, we introduced GFP-tag  
389 with a *hygB* marker into C-terminus of SsdA in the background of C-terminal Flag-tagged  
390 CsmA with *pyrG* as a marker (78). In localization experiments, we generated C-terminal  
391 GFP-tagged CsmA in both the wild type (CEA17) and the  $\Delta$ *ssdA* background by using *pyrG*  
392 and *ptrA* as a selectable marker, respectively. After the constructs were generated,  
393 polyethylene glycol-mediated transformation of fungal protoplasts was performed as  
394 previously described (79). For the *ptrA*-marker transformation, we added pyrithiamine  
395 hydrobromide (Sigma P0256) into 1.2 M sorbitol (SMM) media at 0.1 mg/L (74). For the  
396 *hygB*-marker transformation, we recovered the strains containing the *hygB* marker by adding

397 hygromycin B (Calbichem 400052) into the 0.7% top SMM agar at 150  $\mu\text{g}/\text{mL}$  the day after  
398 transformation (75).

399

#### 400 **Germination assays and Biomass assays**

401  $10^8$  conidia in 100mL LGMM of each strain were cultured at  $37^\circ\text{C}$  in three biological  
402 replicates. 500  $\mu\text{L}$  of each culture was taken to count for germling percentage at indicated  
403 time points. For biomass assays,  $10^8$  conidia in 100mL LGMM of each strain were cultured  
404 for 24 hours at  $37^\circ\text{C}$  in three biological replicates. The biomass was collected, lyophilized  
405 and dry weight was recorded.

406

#### 407 **Cell wall perturbing agents and antifungal agents**

408 Several cell-wall perturbing agents were utilized for cell wall integrity tests: Congo red (CR,  
409 Sigma C6277), Calcofluor white (CFW, Fluorescent brightener 28, Sigma F3543), and  
410 Caspofungin (CPG, Cancidas, MERCK&CO., INC.). CR, CFW, or CPG were added into  
411 GMM plates at final concentrations of 1 mg/mL, 50  $\mu\text{g}/\text{mL}$ , and 1  $\mu\text{g}/\text{mL}$ , respectively.  
412 Dropout assays were performed by plating serial conidial dilutions from  $1 \times 10^5$  to  $1 \times 10^2$   
413 conidia in a 5- $\mu\text{L}$  drop of each strain. The plates were cultured at  $37^\circ\text{C}$  with 5%  $\text{CO}_2$  and the  
414 images were taken at 48 hours. This experiment was performed in three biological replicates  
415 (40).

416

#### 417 **Cell-wall PAMP exposure**

418 Calcofluor white (CFW, 25 $\mu\text{g}/\text{mL}$ ), fluorescein-labeled wheat germ agglutinin (WGA, 5  
419  $\mu\text{g}/\text{mL}$ ) (Vector labs: FL-1021), and soluble dectin-1 staining were performed as previously  
420 described (80, 81). Briefly, each fungal strain was cultured until it reached the germination  
421 stage on liquid glucose minimal media. The hyphae were UV irradiated at 6,000  $\text{mJ}/\text{cm}^2$ . The

422 micrographs were taken by the Z-stack of the fluorescent microscope, Zeiss HAL 100 (Carl  
423 Zeiss Microscopy, LLC, Thornwood, NY, USA) equipped with a Zeiss AxioCam MRm  
424 camera. The intensity was analyzed using ImageJ and the corrected total cell fluorescence  
425 (CTCF) was calculated (80, 82). Data are represented as mean +/- SE of 15 images from  
426 three biological replicates.

427

### 428 **Adherence Assay and Biofilm Microscopy**

429 For the crystal violet adherence assay, 100 $\mu$ L of 10<sup>5</sup> spores per mL in GMM were  
430 inoculated into U-bottomed 96-well plates and grown for 24 hours at 37°C. Plates were  
431 washed with H<sub>2</sub>O twice, stained with 0.1% (w/v) crystal violet in water for 10 minutes,  
432 washed twice more with H<sub>2</sub>O to remove excess stain, and destained with 100% ethanol for 10  
433 minutes. An aliquot of the de-stained supernatants were transferred to a flat-bottomed 96-well  
434 plate and Abs<sub>600</sub> was measured using a plate reader. Results were analyzed using a One-Way  
435 ANOVA with a Tukey post-test. For microscopy, 10<sup>5</sup> spores per mL in GMM were grown  
436 for 24 hours at 37°C on Mattek dishes (Mattek: P35G-1.5-10-C). Biofilms were stained with  
437 20 $\mu$ g/mL FITC-SBA (Vector Labs: FL-1011) and fixed with 1% paraformaldehyde. Stained  
438 biofilms were imaged using a 20X-multi-immersion objective on an Andor W1 Spinning  
439 Disk Confocal with a Nikon Eclipse Ti inverted microscope stand with Perfect Focus and  
440 equipped with two Andor Zyla cameras and ASI MS-2000 stage. Z-stacks of the first 300-  
441 320 $\mu$ m were taken for each sample. Microscopy was performed on three biological replicates  
442 per strain.

443

### 444 **RNA Extraction and qRT-PCR**

445 RNA was extracted from 24-hour biofilms grown at 37°C in GMM. Briefly, fungal tissue was  
446 flash frozen and bead beat with 2.3mm zirconia/silica beads in 200  $\mu$ l of TriSure (Bioline:

447 BIO-38032). Homogenized mycelia were brought to a final volume of 1mL and RNA was  
448 processed according to manufacturer's instructions. For qRT-PCR, 5ug of RNA was DNase  
449 treated with Ambion Turbo DNase (Life Technologies) according to the manufacturer's  
450 instruction. For qRT-PCR DNase treated-RNA was processed as previously described (83).  
451 mRNA levels were normalized to *tef1* for all qRT-PCR analyses. Statistical analysis was  
452 performed with One-Way ANOVA with Tukey post-test. Error bars indicate standard  
453 deviation of the mean (SD).

454

#### 455 **Chitin synthase activity assay**

456  $10^8$  conidia of each fungal strain were grown at 37°C for 24 hours in 10mL of liquid GMM at  
457 250 rpm. The mycelia were collected to prepare of membrane fractions by a centrifugation at  
458 100,000g for 40 min at 4°C as described before. After that, the nonradioactive chitin synthase  
459 activity assay was performed in a 96-well plate as previously described (56, 57).

460

#### 461 **Trehalose measurement**

462 Trehalose content in conidia and mycelia was as previously described (40). Briefly, *A.*  
463 *fumigatus* strains were grown on GMM plates at 37°C for 3 days. A total of  $2 \times 10^8$  conidia  
464 were used for the conidial stage of the trehalose assay, and  $1 \times 10^8$  conidia in 10mL LGMM  
465 were cultured overnight for the mycelial stage as described by d'Enfert C and Fontaine  
466 (1997) (53). Cell-free extracts were then tested for trehalose levels according to the Glucose  
467 Assay Kit protocols (Sigma AGO20). Results from biological triplicate experiments were  
468 averaged, standard deviation calculated, and statistical significance determined ( $P < 0.05$ )  
469 with a two-tailed Student's *t*-test.

470

#### 471 **Murine models of invasive pulmonary aspergillosis**

472 CD1 female mice, 6–8 weeks old, were used in the triamcinolone (steroid) or the  
473 chemotherapeutic murine model experiments as previously described (40, 41, 58). Mice were  
474 obtained from Charles River Laboratories (Raleigh, NC). For survival studies and  
475 histopathology, 10 mice per *A. fumigatus* strain (CEA10,  $\Delta ssdA$ ,  $\Delta ssdA+ssdA-GFP$ , and  
476 OE:*ssdA*) were inoculated intranasally with  $2 \times 10^6$  conidia in 40  $\mu$ L of phosphate-buffered  
477 saline (PBS) for the triamcinolone model and  $1 \times 10^6$  conidia for the chemotherapeutic model,  
478 and monitored three times a day. Mice were observed for 14 days after the *A. fumigatus*  
479 challenge. Any animals showing distress were immediately humanely sacrificed and recorded  
480 as deaths within 24 hrs. No mock inoculated animals perished. Statistical comparison of the  
481 associated Kaplan-Meier curves was conducted with log rank tests (84). Lungs from all mice  
482 sacrificed at different time points during the experiment were removed for differential cell  
483 count and histopathology.

#### 484 **Histopathology**

485 Three mice in each group (CEA10,  $\Delta ssdA$ ,  $\Delta ssdA+ssdA-GFP$ , and OE:*ssdA*) were humanely  
486 euthanized at day 3 post-inoculation. Lungs were harvested from each group and fixed in  
487 10% formalin before embedding in paraffin. 5 $\mu$ m-thick sections were taken and stained with  
488 either H&E (Hematoxylin and Eosin) or GMS (Gomori-Methenamine Silver stain) as  
489 previously described (85). The microscopic examination was performed on a Zeiss Axioplan  
490 II microscope and engaged imaging system. Images were captured at 50x magnification as  
491 indicated in each image.

492

#### 493 **Collection and analysis of bronchoalveolar lavage fluid (BALF)**

494 At the indicated time after *A. fumigatus* instillation, mice were euthanized using CO<sub>2</sub>.  
495 Bronchoalveolar lavage fluid (BALF) was collected by washing the lungs with 2 mL of PBS  
496 containing 0.05M EDTA. BALF was then centrifuged and the supernatant collected and



497 stored at  $-20^{\circ}\text{C}$  until analysis. BAL cells were resuspended in 200  $\mu\text{l}$  of PBS and counted on a  
498 hemocytometer to determine total cell counts. Cells were then spun onto glass slides using a  
499 Thermo Scientific Cytospin4 cytocentrifuge and subsequently stained with a Diff-Quik  
500 staining kit (Electron Microscopy Sciences) for differential cell counting (80).

501

## 502 **Ethics statement**

503 This study was carried out in strict accordance with the recommendations in the Guide for the  
504 Care and Use of Laboratory Animals of the National Institutes of Health. The animal  
505 experimental protocol was approved by the Institutional Animal Care and Use Committee  
506 (IACUC) at Dartmouth College (protocol number cram.ra.1).

507

508

## 509 **Acknowledgments**

510 We thank the members of the microscope facilities in the Department of Biology at  
511 Dartmouth College. A.T. thanks Dr. Dawoon Chung for initial training in *A. fumigatus*  
512 molecular genetics techniques. A.T. and R.A.C. thank Dr. Jarrod Fortwendel for the chitin  
513 synthase activity assay protocol and Thomas Hampton for suggestions on statistical analysis.  
514 A.T. also thanks the Department of Microbiology, Faculty of Medicine, Chulalongkorn  
515 University, Bangkok, Thailand for fellowship support.

516

## 517 **Funding information**

518 .....  
518 HHS | NIH | National Institute of Allergy and Infectious Diseases (NIAID)

519 R01AI081838 Robert A. Cramer; Burroughs Wellcome Fund (BWF) Robert A. Cramer;

520 National Institute of General Medicine Sciences (NIGMS)P30GM106394 Bruce Stanton;

521 JK is supported in part by NIH/NIAID T32AI007519. The funders had no role in study  
522 design, data collection and analysis, decision to publish, or preparation of the manuscript.

523

524

525

526

527

528

529

530

531

532

533

534

535

536

537

538

539

540

541

542

## 543 References

- 544 1. Brown GD, Denning DW, Gow NA, Levitz SM, Netea MG, White TC. 2012. Hidden  
545 killers: human fungal infections. *Sci Transl Med* 4:165rv13.
- 546 2. Zonios DI, Bennett JE. 2008. Update on azole antifungals. *Semin Respir Crit Care*  
547 *Med* 29:198-210.
- 548 3. Rex JH, Stevens DA. 2015. Drugs Active against Fungi, Pneumocystis, and  
549 Microsporidia, p 479-494e4. *In* Bennett JE, Dolin R, M.J. B (ed), Mandell, Douglas,  
550 and Bennett's Principles and Practice of Infectious Diseases, 8th ed. Saunders.
- 551 4. Mihaila RG. 2015. Voriconazole and the liver. *World J Hepatol* 7:1828-33.
- 552 5. Sawaya BP, Weihprecht H, Campbell WR, Lorenz JN, Webb RC, Briggs JP,  
553 Schnermann J. 1991. Direct vasoconstriction as a possible cause for amphotericin B-  
554 induced nephrotoxicity in rats. *J Clin Invest* 87:2097-107.
- 555 6. Vermeulen E, Maertens J, De Bel A, Nulens E, Boelens J, Surmont I, Mertens A,  
556 Boel A, Lagrou K. 2015. Nationwide Surveillance of Azole Resistance in *Aspergillus*  
557 *Diseases*. *Antimicrob Agents Chemother* 59:4569-76.
- 558 7. Fuhren J, Voskuil WS, Boel CH, Haas PJ, Hagen F, Meis JF, Kusters JG. 2015. High  
559 prevalence of azole resistance in *Aspergillus fumigatus* isolates from high-risk  
560 patients. *J Antimicrob Chemother* 70:2894-8.
- 561 8. de Fontbrune FS, Denis B, Meunier M, Garcia-Hermoso D, Bretagne S, Alanio A.  
562 2014. Iterative breakthrough invasive aspergillosis due to TR(34) /L98H azole-  
563 resistant *Aspergillus fumigatus* and *Emericella sublata* in a single hematopoietic stem  
564 cell transplant patient. *Transpl Infect Dis* 16:687-91.
- 565 9. Burgel PR, Baixench MT, Amsellem M, Audureau E, Chapron J, Kanaan R, Honore  
566 I, Dupouy-Camet J, Dusser D, Klaassen CH, Meis JF, Hubert D, Paugam A. 2012.  
567 High prevalence of azole-resistant *Aspergillus fumigatus* in adults with cystic fibrosis  
568 exposed to itraconazole. *Antimicrob Agents Chemother* 56:869-74.
- 569 10. Jensen RH, Hagen F, Astvad KM, Tyron A, Meis JF, Arendrup MC. 2016. Azole-  
570 resistant *Aspergillus fumigatus* in Denmark: a laboratory-based study on resistance  
571 mechanisms and genotypes. *Clin Microbiol Infect* 22:570 e1-9.
- 572 11. Brillowska-Dabrowska A, Mroczynska M, Nawrot U, Wlodarczyk K, Kurzyk E.  
573 2015. Examination of *cyp51A* and *cyp51B* expression level of the first Polish azole  
574 resistant clinical *Aspergillus fumigatus* isolate. *Acta Biochim Pol* 62:837-9.
- 575 12. Lazzarini C, Esposto MC, Prigitano A, Cogliati M, De Lorenzis G, Tortorano AM.  
576 2015. Azole Resistance in *Aspergillus fumigatus* Clinical Isolates from an Italian  
577 Culture Collection. *Antimicrob Agents Chemother* 60:682-5.
- 578 13. Steinmann J, Hamprecht A, Vehreschild MJ, Cornely OA, Buchheidt D, Spiess B,  
579 Koldehoff M, Buer J, Meis JF, Rath PM. 2015. Emergence of azole-resistant invasive  
580 aspergillosis in HSCT recipients in Germany. *J Antimicrob Chemother* 70:1522-6.
- 581 14. Howard SJ, Cerar D, Anderson MJ, Albarrag A, Fisher MC, Pasqualotto AC,  
582 Laverdiere M, Arendrup MC, Perlin DS, Denning DW. 2009. Frequency and  
583 evolution of Azole resistance in *Aspergillus fumigatus* associated with treatment  
584 failure. *Emerg Infect Dis* 15:1068-76.
- 585 15. Chowdhary A, Kathuria S, Randhawa HS, Gaur SN, Klaassen CH, Meis JF. 2012.  
586 Isolation of multiple-triazole-resistant *Aspergillus fumigatus* strains carrying the  
587 TR/L98H mutations in the *cyp51A* gene in India. *J Antimicrob Chemother* 67:362-6.
- 588 16. Chowdhary A, Sharma C, van den Boom M, Yntema JB, Hagen F, Verweij PE, Meis  
589 JF. 2014. Multi-azole-resistant *Aspergillus fumigatus* in the environment in Tanzania.  
590 *J Antimicrob Chemother* 69:2979-83.

- 591 17. Badali H, Vaezi A, Haghani I, Yazdanparast SA, Hedayati MT, Mousavi B, Ansari S,  
592 Hagen F, Meis JF, Chowdhary A. 2013. Environmental study of azole-resistant  
593 *Aspergillus fumigatus* with TR34/L98H mutations in the *cyp51A* gene in Iran.  
594 *Mycoses* 56:659-63.
- 595 18. Ahmad S, Khan Z, Hagen F, Meis JF. 2014. Occurrence of triazole-resistant  
596 *Aspergillus fumigatus* with TR34/L98H mutations in outdoor and hospital  
597 environment in Kuwait. *Environ Res* 133:20-6.
- 598 19. Kidd SE, Goeman E, Meis JF, Slavin MA, Verweij PE. 2015. Multi-triazole-resistant  
599 *Aspergillus fumigatus* infections in Australia. *Mycoses* 58:350-5.
- 600 20. Ozmerdiven GE, Ak S, Ener B, Agca H, Cilo BD, Tunca B, Akalin H. 2015. First  
601 determination of azole resistance in *Aspergillus fumigatus* strains carrying the  
602 TR34/L98H mutations in Turkey. *J Infect Chemother* 21:581-6.
- 603 21. Wu CJ, Wang HC, Lee JC, Lo HJ, Dai CT, Chou PH, Ko WC, Chen YC. 2015.  
604 Azole-resistant *Aspergillus fumigatus* isolates carrying TR(3)(4)/L98H mutations in  
605 Taiwan. *Mycoses* 58:544-9.
- 606 22. Chen Y, Lu Z, Zhao J, Zou Z, Gong Y, Qu F, Bao Z, Qiu G, Song M, Zhang Q, Liu  
607 L, Hu M, Han X, Tian S, Zhao J, Chen F, Zhang C, Sun Y, Verweij PE, Huang L,  
608 Han L. 2016. Epidemiology and Molecular Characterizations of Azole Resistance in  
609 Clinical and Environmental *Aspergillus fumigatus* Isolates from China. *Antimicrob*  
610 *Agents Chemother* 60:5878-84.
- 611 23. Pelaez T, Monteiro MC, Garcia-Rubio R, Bouza E, Gomez-Lopez A, Mellado E.  
612 2015. First detection of *Aspergillus fumigatus* azole-resistant strain due to Cyp51A  
613 TR46/Y121F/T289A in an azole-naive patient in Spain. *New Microbes New Infect*  
614 6:33-4.
- 615 24. Lavergne RA, Morio F, Favennec L, Dominique S, Meis JF, Gargala G, Verweij PE,  
616 Le Pape P. 2015. First description of azole-resistant *Aspergillus fumigatus* due to  
617 TR46/Y121F/T289A mutation in France. *Antimicrob Agents Chemother* 59:4331-5.
- 618 25. Hagiwara D, Takahashi H, Fujimoto M, Sugahara M, Misawa Y, Gono T, Itoyama S,  
619 Watanabe A, Kamei K. 2016. Multi-azole resistant *Aspergillus fumigatus* harboring  
620 Cyp51A TR46/Y121F/T289A isolated in Japan. *J Infect Chemother* 22:577-9.
- 621 26. Tangwattanachuleeporn M, Minarin N, Saichan S, Sermsri P, Mitkornburee R, Gross  
622 U, Chindamporn A, Bader O. 2016. Prevalence of azole-resistant *Aspergillus*  
623 *fumigatus* in the environment of Thailand. *Med Mycol* doi:10.1093/mmy/myw090.
- 624 27. Wiederhold NP, Gil VG, Gutierrez F, Lindner JR, Albataineh MT, McCarthy DI,  
625 Sanders C, Fan H, Fothergill AW, Sutton DA. 2016. First Detection of TR34 L98H  
626 and TR46 Y121F T289A Cyp51 Mutations in *Aspergillus fumigatus* Isolates in the  
627 United States. *J Clin Microbiol* 54:168-71.
- 628 28. Le Pape P, Lavergne RA, Morio F, Alvarez-Moreno C. 2016. Multiple Fungicide-  
629 Driven Alterations in Azole-Resistant *Aspergillus fumigatus*, Colombia, 2015. *Emerg*  
630 *Infect Dis* 22:156-7.
- 631 29. Georgopapadakou NH, Tkacz JS. 1995. The fungal cell wall as a drug target. *Trends*  
632 *Microbiol* 3:98-104.
- 633 30. Bernard M, Latge JP. 2001. *Aspergillus fumigatus* cell wall: composition and  
634 biosynthesis. *Med Mycol* 39 Suppl 1:9-17.
- 635 31. Bruneau JM, Magnin T, Tagat E, Legrand R, Bernard M, Diaquin M, Fudali C, Latge  
636 JP. 2001. Proteome analysis of *Aspergillus fumigatus* identifies  
637 glycosylphosphatidylinositol-anchored proteins associated to the cell wall  
638 biosynthesis. *Electrophoresis* 22:2812-23.
- 639 32. Beauvais A, Latge JP. 2001. Membrane and cell wall targets in *Aspergillus fumigatus*.  
640 *Drug Resist Updat* 4:38-49.

- 641 33. Fontaine T, Simenel C, Dubreucq G, Adam O, Delepierre M, Lemoine J, Vorgias CE,  
642 Diaquin M, Latge JP. 2000. Molecular organization of the alkali-insoluble fraction of  
643 *Aspergillus fumigatus* cell wall. *J Biol Chem* 275:41528.
- 644 34. Fontaine T, Simenel C, Dubreucq G, Adam O, Delepierre M, Lemoine J, Vorgias CE,  
645 Diaquin M, Latge JP. 2000. Molecular organization of the alkali-insoluble fraction of  
646 *Aspergillus fumigatus* cell wall. *J Biol Chem* 275:27594-607.
- 647 35. Mouyna I, Hartland RP, Fontaine T, Diaquin M, Simenel C, Delepierre M, Henrissat  
648 B, Latge JP. 1998. A 1,3-beta-glucanosyltransferase isolated from the cell wall of  
649 *Aspergillus fumigatus* is a homologue of the yeast Bgl2p. *Microbiology* 144 ( Pt  
650 11):3171-80.
- 651 36. Fontaine T, Hartland RP, Diaquin M, Simenel C, Latge JP. 1997. Differential patterns  
652 of activity displayed by two exo-beta-1,3-glucanases associated with the *Aspergillus*  
653 *fumigatus* cell wall. *J Bacteriol* 179:3154-63.
- 654 37. Hartland RP, Fontaine T, Debeaupuis JP, Simenel C, Delepierre M, Latge JP. 1996. A  
655 novel beta-(1-3)-glucanosyltransferase from the cell wall of *Aspergillus fumigatus*. *J*  
656 *Biol Chem* 271:26843-9.
- 657 38. Latge JP, Debeaupuis JP, Sarfati J, Diaquin M, Paris S. 1993. Cell wall antigens in  
658 *Aspergillus fumigatus*. *Arch Med Res* 24:269-74.
- 659 39. Al-Bader N, Vanier G, Liu H, Gravelat FN, Urb M, Hoareau CM, Campoli P, Chabot  
660 J, Filler SG, Sheppard DC. 2010. Role of trehalose biosynthesis in *Aspergillus*  
661 *fumigatus* development, stress response, and virulence. *Infect Immun* 78:3007-18.
- 662 40. Puttikamonkul S, Willger SD, Grahl N, Perfect JR, Movahed N, Bothner B, Park S,  
663 Paderu P, Perlin DS, Cramer RA, Jr. 2010. Trehalose 6-phosphate phosphatase is  
664 required for cell wall integrity and fungal virulence but not trehalose biosynthesis in  
665 the human fungal pathogen *Aspergillus fumigatus*. *Mol Microbiol* 77:891-911.
- 666 41. Thammahong A, Caffrey-Card AK, Dhingra S, Obar JJ, Cramer RA. 2017.  
667 *Aspergillus fumigatus* Trehalose-Regulatory Subunit Homolog Moonlights To  
668 Mediate Cell Wall Homeostasis through Modulation of Chitin Synthase Activity.  
669 *MBio* 8.
- 670 42. Thammahong A, Puttikamonkul S, Perfect JR, Brennan RG, Cramer RA. 2017.  
671 Central Role of the Trehalose Biosynthesis Pathway in the Pathogenesis of Human  
672 Fungal Infections: Opportunities and Challenges for Therapeutic Development.  
673 *Microbiol Mol Biol Rev* 81.
- 674 43. Uesono Y, Toh-e A, Kikuchi Y. 1997. Ssd1p of *Saccharomyces cerevisiae* associates  
675 with RNA. *J Biol Chem* 272:16103-9.
- 676 44. Hogan DJ, Riordan DP, Gerber AP, Herschlag D, Brown PO. 2008. Diverse RNA-  
677 binding proteins interact with functionally related sets of RNAs, suggesting an  
678 extensive regulatory system. *PLoS Biol* 6:e255.
- 679 45. Uesono Y, Fujita A, Toh-e A, Kikuchi Y. 1994. The *MCSI/SSDI/SRK1/SSL1* gene is  
680 involved in stable maintenance of the chromosome in yeast. *Gene* 143:135-8.
- 681 46. Kosodo Y, Imai K, Hirata A, Noda Y, Takatsuki A, Adachi H, Yoda K. 2001.  
682 Multicopy suppressors of the *sly1* temperature-sensitive mutation in the ER-Golgi  
683 vesicular transport in *Saccharomyces cerevisiae*. *Yeast* 18:1003-14.
- 684 47. Vannier D, Damay P, Shore D. 2001. A role for Sds3p, a component of the  
685 Rpd3p/Sin3p deacetylase complex, in maintaining cellular integrity in *Saccharomyces*  
686 *cerevisiae*. *Mol Genet Genomics* 265:560-8.
- 687 48. Kaeberlein M, Guarente L. 2002. *Saccharomyces cerevisiae* *MPT5* and *SSDI* function  
688 in parallel pathways to promote cell wall integrity. *Genetics* 160:83-95.
- 689 49. Reinke A, Anderson S, McCaffery JM, Yates J, 3rd, Aronova S, Chu S, Fairclough S,  
690 Iverson C, Wedaman KP, Powers T. 2004. TOR complex 1 includes a novel



- 691 component, Tco89p (YPL180w), and cooperates with Ssd1p to maintain cellular  
692 integrity in *Saccharomyces cerevisiae*. *J Biol Chem* 279:14752-62.
- 693 50. Wheeler RT, Kupiec M, Magnelli P, Abeijon C, Fink GR. 2003. A *Saccharomyces*  
694 *cerevisiae* mutant with increased virulence. *Proc Natl Acad Sci U S A* 100:2766-70.
- 695 51. Gank KD, Yeaman MR, Kojima S, Yount NY, Park H, Edwards JE, Jr., Filler SG, Fu  
696 Y. 2008. SSD1 is integral to host defense peptide resistance in *Candida albicans*.  
697 *Eukaryot Cell* 7:1318-27.
- 698 52. Tanaka S, Yamada K, Yabumoto K, Fujii S, Huser A, Tsuji G, Koga H, Dohi K, Mori  
699 M, Shiraishi T, O'Connell R, Kubo Y. 2007. *Saccharomyces cerevisiae* SSD1  
700 orthologues are essential for host infection by the ascomycete plant pathogens  
701 *Colletotrichum lagenarium* and *Magnaporthe grisea*. *Mol Microbiol* 64:1332-49.
- 702 53. d'Enfert C, Fontaine T. 1997. Molecular characterization of the *Aspergillus nidulans*  
703 *treA* gene encoding an acid trehalase required for growth on trehalose. *Mol Microbiol*  
704 24:203-16.
- 705 54. Herold I, Yarden O. 2017. Regulation of *Neurospora crassa* cell wall remodeling via  
706 the *cot-1* pathway is mediated by *gul-1*. *Curr Genet* 63:145-159.
- 707 55. Gravelat FN, Beauvais A, Liu H, Lee MJ, Snarr BD, Chen D, Xu W, Kravtsov I,  
708 Hoareau CM, Vanier G, Urb M, Campoli P, Al Abdallah Q, Lehoux M, Chabot JC,  
709 Ouimet MC, Baptista SD, Fritz JH, Nierman WC, Latge JP, Mitchell AP, Filler SG,  
710 Fontaine T, Sheppard DC. 2013. *Aspergillus galactosaminogalactan* mediates  
711 adherence to host constituents and conceals hyphal beta-glucan from the immune  
712 system. *PLoS Pathog* 9:e1003575.
- 713 56. Fortwendel JR, Juvvadi PR, Perfect BZ, Rogg LE, Perfect JR, Steinbach WJ. 2010.  
714 Transcriptional regulation of chitin synthases by calcineurin controls paradoxical  
715 growth of *Aspergillus fumigatus* in response to caspofungin. *Antimicrob Agents*  
716 *Chemother* 54:1555-63.
- 717 57. Lucero HA, Kuranda MJ, Bulik DA. 2002. A nonradioactive, high throughput assay  
718 for chitin synthase activity. *Anal Biochem* 305:97-105.
- 719 58. Grahl N, Puttikamonkul S, Macdonald JM, Gamcsik MP, Ngo LY, Hohl TM, Cramer  
720 RA. 2011. In vivo hypoxia and a fungal alcohol dehydrogenase influence the  
721 pathogenesis of invasive pulmonary aspergillosis. *PLoS Pathog* 7:e1002145.
- 722 59. Valiante V, Macheleidt J, Foge M, Brakhage AA. 2015. The *Aspergillus fumigatus*  
723 cell wall integrity signaling pathway: drug target, compensatory pathways, and  
724 virulence. *Front Microbiol* 6:325.
- 725 60. Gancedo C, Flores CL. 2004. The importance of a functional trehalose biosynthetic  
726 pathway for the life of yeasts and fungi. *FEMS Yeast Res* 4:351-9.
- 727 61. Reinke CA, Kozik P, Glick BS. 2004. Golgi inheritance in small buds of  
728 *Saccharomyces cerevisiae* is linked to endoplasmic reticulum inheritance. *Proc Natl*  
729 *Acad Sci U S A* 101:18018-23.
- 730 62. Gerik KJ, Donlin MJ, Soto CE, Banks AM, Banks IR, Maligie MA, Selitrennikoff  
731 CP, Lodge JK. 2005. Cell wall integrity is dependent on the PKC1 signal transduction  
732 pathway in *Cryptococcus neoformans*. *Mol Microbiol* 58:393-408.
- 733 63. Lee HJ, Kim JM, Kang WK, Yang H, Kim JY. 2015. The NDR Kinase Cbk1  
734 Downregulates the Transcriptional Repressor Nrg1 through the mRNA-Binding  
735 Protein Ssd1 in *Candida albicans*. *Eukaryot Cell* 14:671-83.
- 736 64. Saputo S, Norman KL, Murante T, Horton BN, Diaz Jde L, DiDone L, Colquhoun J,  
737 Schroeder JW, Simmons LA, Kumar A, Krysan DJ. 2016. Complex  
738 Haploinsufficiency-Based Genetic Analysis of the NDR/Lats Kinase Cbk1 Provides  
739 Insight into Its Multiple Functions in *Candida albicans*. *Genetics* 203:1217-33.

- 740 65. Terenzi HF, Reissig JL. 1967. Modifiers of the cot gene in Neurospora: the gulliver  
741 mutants. *Genetics* 56:321-9.
- 742 66. Johns SA, Leeder AC, Safaie M, Turner G. 2006. Depletion of *Aspergillus nidulans*  
743 *cotA* causes a severe polarity defect which is not suppressed by the nuclear migration  
744 mutation *nudA2*. *Mol Genet Genomics* 275:593-604.
- 745 67. Shi J, Chen W, Liu Q, Chen S, Hu H, Turner G, Lu L. 2008. Depletion of the MobB  
746 and CotA complex in *Aspergillus nidulans* causes defects in polarity maintenance that  
747 can be suppressed by the environment stress. *Fungal Genet Biol* 45:1570-81.
- 748 68. Gao L, Song Y, Cao J, Wang S, Wei H, Jiang H, Lu L. 2011. Osmotic stabilizer-  
749 coupled suppression of NDR defects is dependent on the calcium-calcineurin  
750 signaling cascade in *Aspergillus nidulans*. *Cell Signal* 23:1750-7.
- 751 69. d'Enfert C. 1996. Selection of multiple disruption events in *Aspergillus fumigatus*  
752 using the orotidine-5'-decarboxylase gene, *pyrG*, as a unique transformation marker.  
753 *Curr Genet* 30:76-82.
- 754 70. da Silva Ferreira ME, Kress MR, Savoldi M, Goldman MH, Hartl A, Heinekamp T,  
755 Brakhage AA, Goldman GH. 2006. The *akuB*(KU80) mutant deficient for  
756 nonhomologous end joining is a powerful tool for analyzing pathogenicity in  
757 *Aspergillus fumigatus*. *Eukaryot Cell* 5:207-11.
- 758 71. Shimizu K, Keller NP. 2001. Genetic involvement of a cAMP-dependent protein  
759 kinase in a G protein signaling pathway regulating morphological and chemical  
760 transitions in *Aspergillus nidulans*. *Genetics* 157:591-600.
- 761 72. Cramer RA, Jr., Gamcsik MP, Brooking RM, Najvar LK, Kirkpatrick WR, Patterson  
762 TF, Balibar CJ, Graybill JR, Perfect JR, Abraham SN, Steinbach WJ. 2006.  
763 Disruption of a nonribosomal peptide synthetase in *Aspergillus fumigatus* eliminates  
764 gliotoxin production. *Eukaryot Cell* 5:972-80.
- 765 73. Weidner G, d'Enfert C, Koch A, Mol PC, Brakhage AA. 1998. Development of a  
766 homologous transformation system for the human pathogenic fungus *Aspergillus*  
767 *fumigatus* based on the *pyrG* gene encoding orotidine 5'-monophosphate  
768 decarboxylase. *Curr Genet* 33:378-85.
- 769 74. Kubodera T, Yamashita N, Nishimura A. 2002. Transformation of *Aspergillus* sp. and  
770 *Trichoderma reesei* using the pyrithiamine resistance gene (*ptrA*) of *Aspergillus*  
771 *oryzae*. *Biosci Biotechnol Biochem* 66:404-6.
- 772 75. Cullen D, Leong SA, Wilson LJ, Henner DJ. 1987. Transformation of *Aspergillus*  
773 *nidulans* with the hygromycin-resistance gene, *hph*. *Gene* 57:21-6.
- 774 76. Liu HL, De Souza CP, Osmani AH, Osmani SA. 2009. The three fungal  
775 transmembrane nuclear pore complex proteins of *Aspergillus nidulans* are dispensable  
776 in the presence of an intact An-Nup84-120 complex. *Mol Biol Cell* 20:616-30.
- 777 77. Liu HL, Osmani AH, Ukil L, Son S, Markossian S, Shen KF, Govindaraghavan M,  
778 Varadaraj A, Hashmi SB, De Souza CP, Osmani SA. 2010. Single-step affinity  
779 purification for fungal proteomics. *Eukaryot Cell* 9:831-3.
- 780 78. Franceschetti M, Bueno E, Wilson RA, Tucker SL, Gomez-Mena C, Calder G, Sesma  
781 A. 2011. Fungal virulence and development is regulated by alternative pre-mRNA  
782 3'end processing in *Magnaporthe oryzae*. *PLoS Pathog* 7:e1002441.
- 783 79. Bok JW, Keller NP. 2004. *LaeA*, a regulator of secondary metabolism in *Aspergillus*  
784 spp. *Eukaryot Cell* 3:527-35.
- 785 80. Shepardson KM, Ngo LY, Amanianda V, Latge JP, Barker BM, Blosser SJ, Iwakura  
786 Y, Hohl TM, Cramer RA. 2013. Hypoxia enhances innate immune activation to  
787 *Aspergillus fumigatus* through cell wall modulation. *Microbes Infect* 15:259-69.
- 788 81. Wagener J, Malireddi RK, Lenardon MD, Koberle M, Vautier S, MacCallum DM,  
789 Biedermann T, Schaller M, Netea MG, Kanneganti TD, Brown GD, Brown AJ, Gow

- 790 NA. 2014. Fungal chitin dampens inflammation through IL-10 induction mediated by  
791 NOD2 and TLR9 activation. *PLoS Pathog* 10:e1004050.
- 792 82. Gavet O, Pines J. 2010. Progressive activation of CyclinB1-Cdk1 coordinates entry to  
793 mitosis. *Dev Cell* 18:533-43.
- 794 83. Beattie SR, Mark KMK, Thammahong A, Ries LNA, Dhingra S, Caffrey-Carr AK,  
795 Cheng C, Black CC, Bowyer P, Bromley MJ, Obar JJ, Goldman GH, Cramer RA.  
796 2017. Filamentous fungal carbon catabolite repression supports metabolic plasticity  
797 and stress responses essential for disease progression. *PLoS Pathog* 13:e1006340.
- 798 84. Willger SD, Cornish EJ, Chung D, Fleming BA, Lehmann MM, Puttikamonkul S,  
799 Cramer RA. 2012. Dsc orthologs are required for hypoxia adaptation, triazole drug  
800 responses, and fungal virulence in *Aspergillus fumigatus*. *Eukaryot Cell* 11:1557-67.
- 801 85. Huppert M, Oliver DJ, Sun SH. 1978. Combined methenamine-silver nitrate and  
802 hematoxylin & eosin stain for fungi in tissues. *J Clin Microbiol* 8:598-603.
- 803

804

805

806

807

808

809

810

811

812

813

814

815

816

817

818

819



820

## 821 **Figure legends**

822

823 **Fig 1. Alteration of *ssdA* expression affects trehalose production, hyphal growth, and**

824 **conidia germination.** (A) Trehalose assays were performed to measure trehalose at both the

825 conidial and mycelial stages using a glucose oxidase assay. Data represented as mean +/- SE

826 of three biological replicates. For the conidial stage, (\*\*\*) indicates  $P$  value = 0.0004,

827 unpaired two-tailed Student's  $t$ -test  $\Delta ssdA$  to the wild type; (\*\*\*) indicates  $P$  value < 0.0001,

828 unpaired two-tailed Student's  $t$ -test compared OE:*ssdA* to the wild type. For the mycelial

829 stage, (\*) indicates  $P$  value = 0.0110, unpaired two-tailed Student's  $t$ -test  $\Delta ssdA$  to the wild

830 type; (\*\*) indicates  $P$  value = 0.007, unpaired two-tailed Student's  $t$ -test OE:*ssdA* to the wild

831 type. (B, C) Radial growth assays were performed with each strain using GMM at 37°C for

832 72 hours (B). Images are a representative image of three independent experiments with

833 similar results. The measurement of the radial growth was performed at 72 hours (C). Data

834 represented as mean +/- SE of three biological replicates. (\*\*\*) indicates  $P$  value < 0.0001

835 (unpaired two-tailed Student's  $t$ -test compared to the wild-type CEA10). (D) Fungal biomass

836 was measured using  $10^8$  spores in 100mL liquid GMM at 37°C for 24 hours. Data represented

837 as mean +/- SE of three biological replicates. (\*) indicates  $P$  value = 0.0133 and (\*\*) indicates

838  $P$  value = 0.0023, unpaired two-tailed Student's  $t$ -test. (E) Germination assays were

839 utilized using  $10^8$  spores in 10mL liquid GMM at 37°C. 500 $\mu$ L of each culture were taken to

840 count for the percentage of germlings at each time point. Data represented as mean +/- SE of

841 three biological replicates. (\*\*) indicates  $P$  value < 0.01, unpaired two-tailed Student's  $t$ -test,

842 compared the *ssdA* null mutant to the wild type at 6-8 hours. (\*\*\*) indicates  $P$  < 0.0001,

843 unpaired two-tailed Student's  $t$ -test, compared the overexpression strain to the wild type at 5-

844 12 hours.

845

846 **Fig 2. SsdA is important for cell wall integrity.** Cell wall perturbing agents, i.e. 1 mg/mL  
847 congo red, 50  $\mu$ g/mL calcofluor white (CFW), and 2  $\mu$ g/mL caspofungin, were utilized to  
848 study cell wall integrity in the respective strains. Cultures were incubated at 37°C for 48  
849 hours. Data are a representative image of three independent experiments all with similar  
850 results.

851

852 **Fig 3. Alteration of *ssdA* expression affects exposure of cell wall PAMPs.** Calcofluor  
853 white (CFW) staining (A), wheat germ agglutinin (WGA) (B), and soluble dectin-1 (sDectin-  
854 1) staining (C) were utilized to observe chitin levels/exposure and the  $\beta$ -glucan exposure on  
855 the cell wall of the respective strains. Each strain was cultured to the germling stage under  
856 normoxic conditions at 37°C. The corrected total cell fluorescence (CTCF) was calculated.  
857 For CFW staining, (\*) indicates  $P$  value = 0.0322, unpaired two-tailed Student's  $t$ -test  
858 compared  $\Delta ssdA$  to the wild type; (\*\*\*) indicates  $P < 0.0001$ , unpaired two-tailed Student's  $t$ -  
859 test compared OE:*ssdA* to the wild type. For WGA staining, (\*\*\*) indicates  $P$  value =  
860 0.0002, unpaired two-tailed Student's  $t$ -test compared  $\Delta ssdA$  to the wild type; (\*\*\*) indicates  
861  $P$  value = 0.0008, unpaired two-tailed Student's  $t$ -test compared OE:*ssdA* to the wild type.  
862 For sDectin-1 staining, (\*) indicates  $P$  value = 0.0389, unpaired two-tailed Student's  $t$ -test  
863 compared  $\Delta ssdA$  to the wild type; (\*\*\*) indicates  $P$  value < 0.0001, unpaired two-tailed  
864 Student's  $t$ -test compared OE:*ssdA* to the wild type. Data are represented as mean +/- SE of  
865 15 images from three biological replicates. Scale bar 3  $\mu$ m. AU, Arbitrary Unit.

866

867 **Fig 4. Expression of *ssdA* Impacts Adherence and Biofilm Formation (A).** Biofilms were  
868 grown at 37°C for 24 hours in wells of a 96 well plate and the crystal violet adherence assay  
869 was performed. Bars represent 6 replicates per strain, and the experiment was repeated 3

870 times with the same results. (\*\*\*) indicates  $P$  value  $< 0.0001$  via One-Way ANOVA with a  
871 Tukey post-test. **(B)**. Micrographs of 24-hour biofilms stained with FITC-conjugated soybean  
872 agglutinin. Images are looking down a Z-stack of the first 300-320 $\mu$ m of the biofilm. Images  
873 are representative of 3 biological replicate cultures. **(C)**. RNA was obtained from 24-hour  
874 biofilm cultures and qRT-PCR was performed for *uge3* mRNA levels. Data were normalized  
875 to *tef1* transcript levels. (n.s.) indicates not significant by One-Way ANOVA with a Tukey  
876 post-test.

877

878 **Fig 5. Chitin activity and CsmA localization (A)**. 10  $\mu$ g of membrane proteins were used to  
879 perform a non-radioactive chitin synthase activity assay. Each strain was cultured at 30 $^{\circ}$ C for  
880 6 hours and switched to 37 $^{\circ}$ C for 24 hours. (\*\*) indicates  $P$  value = 0.0029, unpaired two-  
881 tailed Student's  $t$ -test compared  $\Delta$ *csmA* to the wild type; (\*) indicates  $P$  value = 0.0208,  
882 unpaired two-tailed Student's  $t$ -test compared  $\Delta$ *ssdA* to the wild type; (\*\*\*) indicates  $P$  value  
883  $< 0.0001$ , unpaired two-tailed Student's  $t$ -test compared OE:*ssdA* to the wild type. Data  
884 represented as mean  $\pm$  SE of three biological replicates. **(B)** C-terminal GFP-tagged CsmA  
885 was generated in the wild type,  $\Delta$ *ssdA*,  $\Delta$ *ssdA*+*ssdA*, and OE:*ssdA* backgrounds. Each strain  
886 was cultured at 37 $^{\circ}$ C for 12 hours and live-cell imaging was performed under a Quorum  
887 Technologies WaveFX Spinning Disk Confocal Microscope (1000X). The images were  
888 analyzed using Imaris 8.1.4 software. Data are representative images of 15 images from three  
889 biological replicates. Scale bar 3  $\mu$ m.

890

891 **Figure 6. Overexpression of SsdA attenuates virulence in the triamcinolone murine**  
892 **model while both loss of SsdA ( $\Delta$ *ssdA*) and overexpression of SsdA (OE:*ssdA*) alters**  
893 **immune cell infiltrates.** (A)  $2 \times 10^6$  conidia of each strain were inoculated via the intranasal  
894 route in the corticosteroid IPA murine model. Ten CD1 mice were used in each group.

895 Survival analysis was performed for two weeks. (\*\*) indicates  $P$  value = 0.0033, Log Rank  
896 test compared OE:*ssdA* to the wild type. (B)  $\Delta$ *ssdA* and OE:*ssdA*-infected BALs had  
897 decreased total inflammatory cell infiltrations. Total cell count: (\*) indicates  $P$  value =  
898 0.0159, two-tailed Mann-Whitney  $t$ -test compared  $\Delta$ *ssdA* to the wild type; (\*) indicates  $P$   
899 value = 0.0159, two-tailed Mann-Whitney  $t$ -test compared OE:*ssdA* to the wild type. (C)  
900 OE:*ssdA*-infected lungs show less fungal growth and less cell infiltration compared to the  
901 wild type. The fungal histology was performed on Day3 to observe fungal growth and  
902 inflammatory cell infiltrations. GMS, Gomori-methenamine silver staining; H&E:  
903 hematoxylin and eosin staining. Magnification 50x. (D)  $1 \times 10^6$  conidia of each strain were  
904 inoculated intranasally for the chemotherapeutic murine model and survival analyses were  
905 performed for two weeks using ten CD1 mice per group. For  $\Delta$ *ssdA* mutant, (\*\*) indicates  $P$   
906 value = 0.005, Log Rank test. For OE:*ssdA*, (\*\*) indicates  $P$  value = 0.0049, Log Rank test.  
907 (B)  $\Delta$ *ssdA* and OE:*ssdA*-infected BALs had similar total inflammatory cell infiltrations to the  
908 wild type BALs.  
909 (C) OE:*ssdA*-infected lungs showed less fungal growth compared to the wild type. Histology  
910 was performed on Day3 to observe fungal growth and inflammatory cell infiltration. GMS,  
911 Gomori-methenamine silver staining; H&E: hematoxylin and eosin staining. Magnification  
912 50x and 100x.  
913  
914  
915  
916  
917  
918  
919  
920



A.

Conidial stage

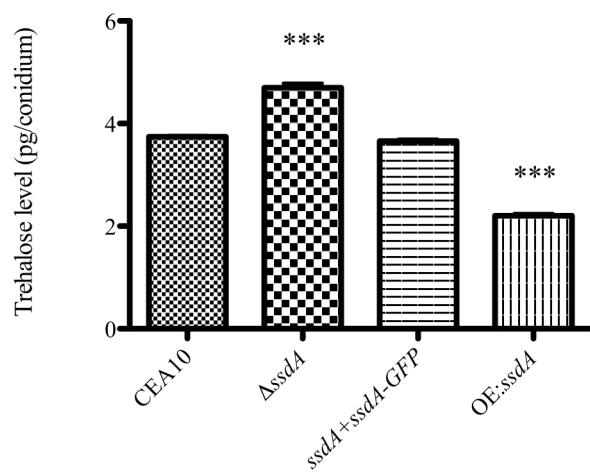

Mycelial stage

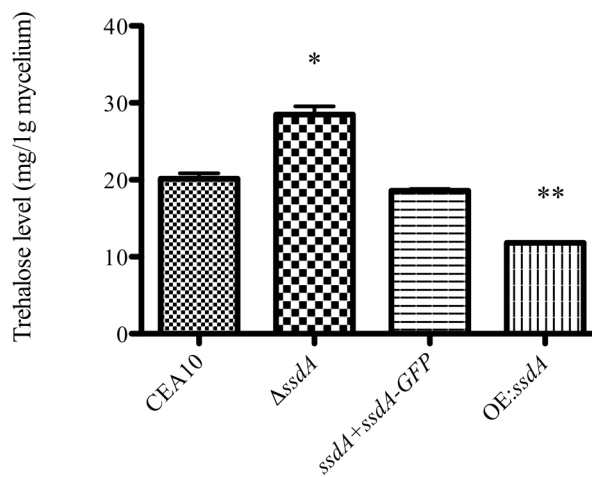

B.

CEA10

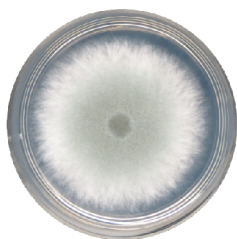 $\Delta ssdA$ 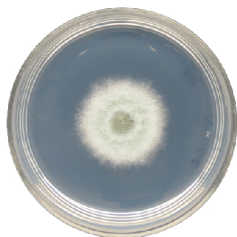 $\Delta ssdA+ssdA$   
GFP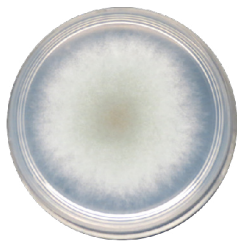OE:  $ssdA$ 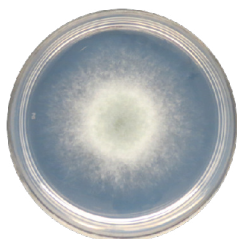

C.

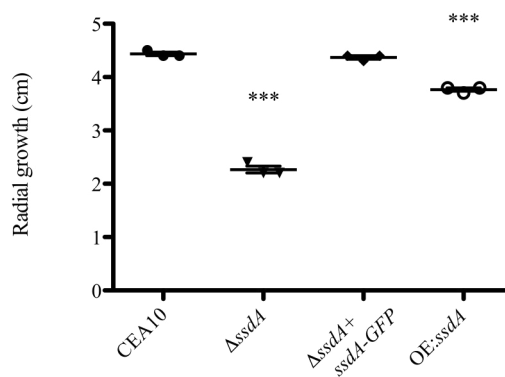

D.

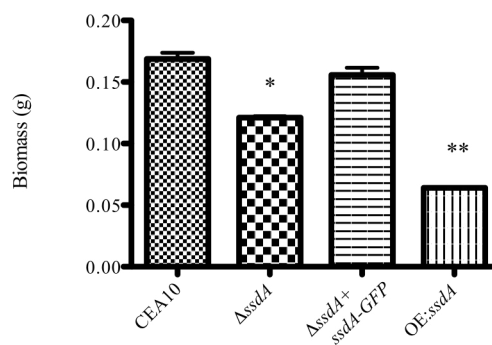

E.

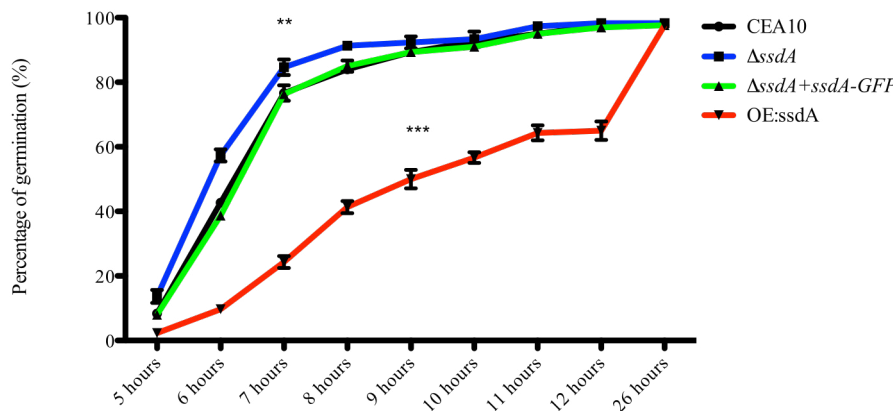

A.

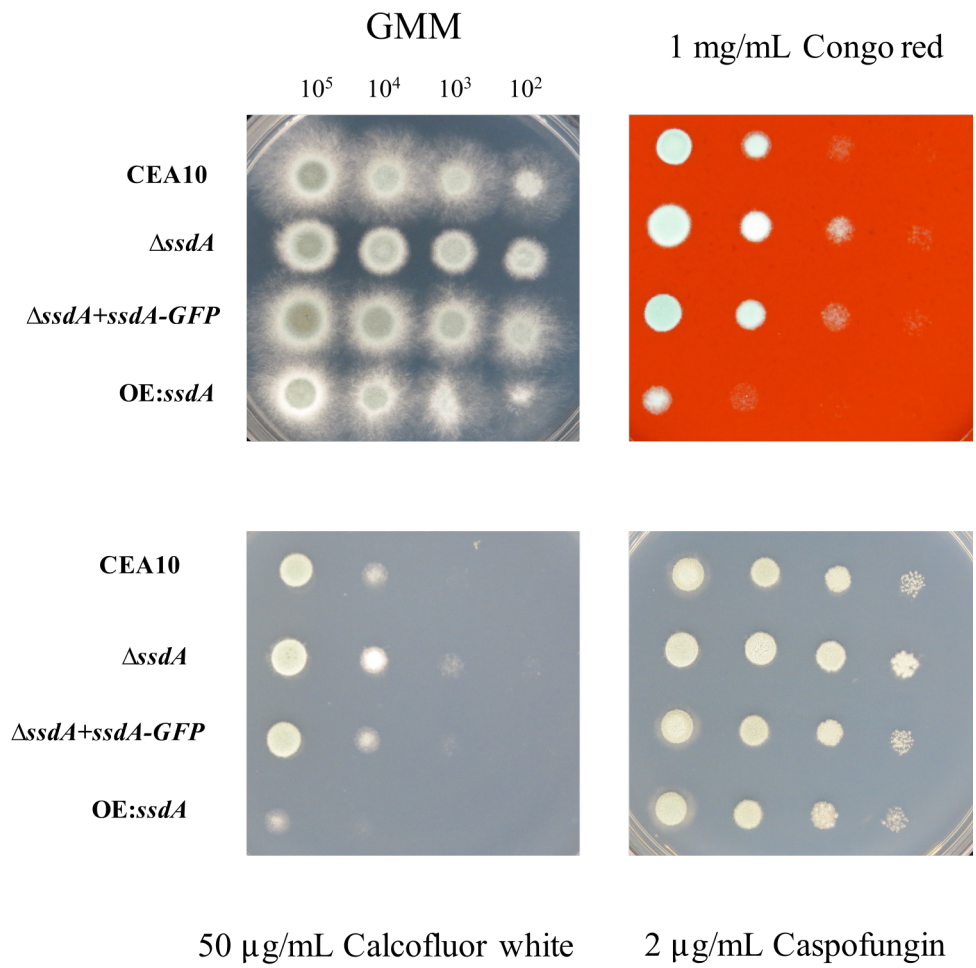

A.

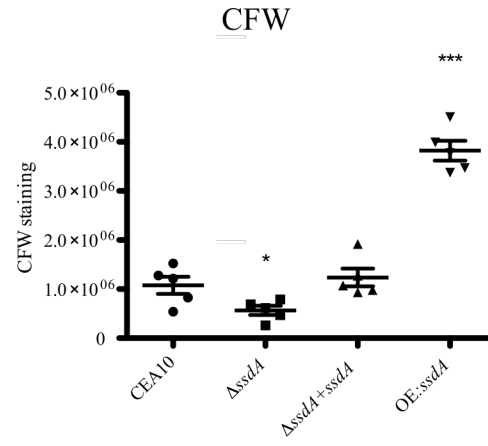

B.

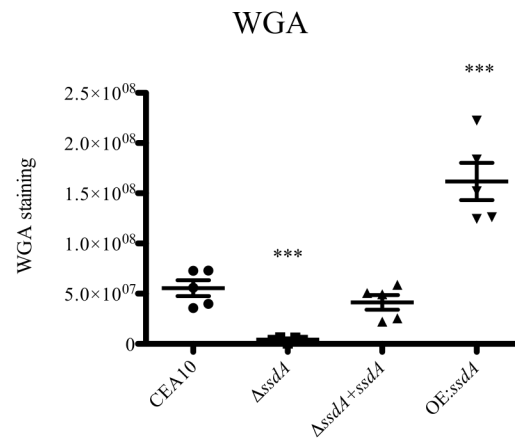

C.

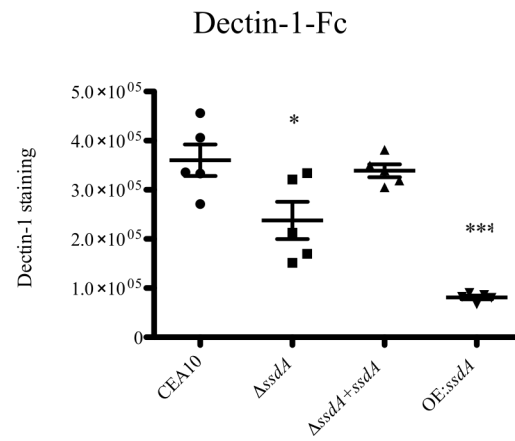



B.

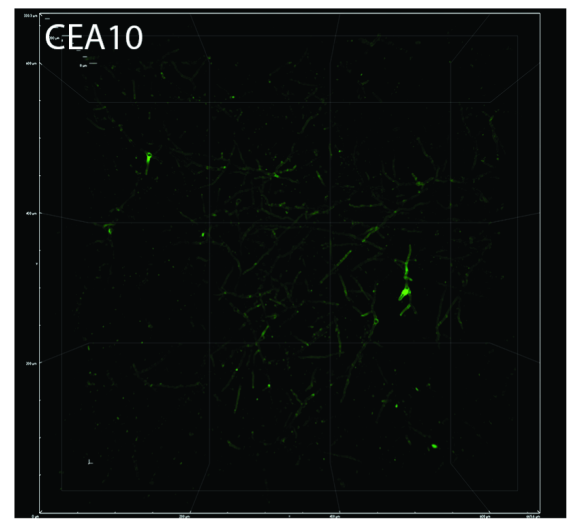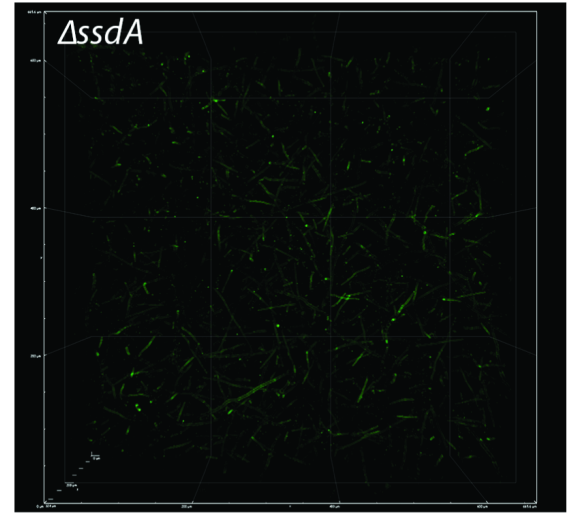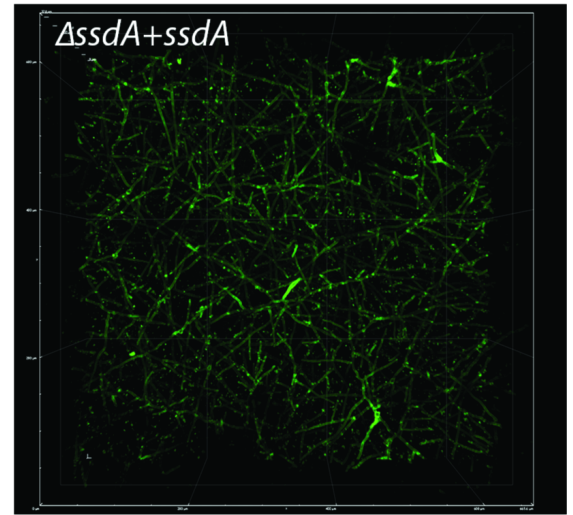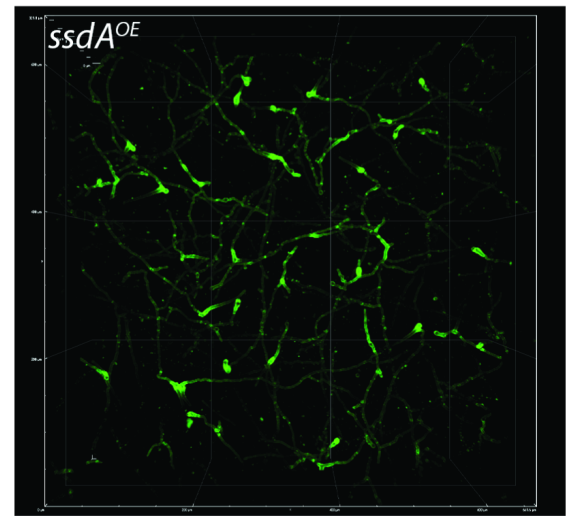

A.

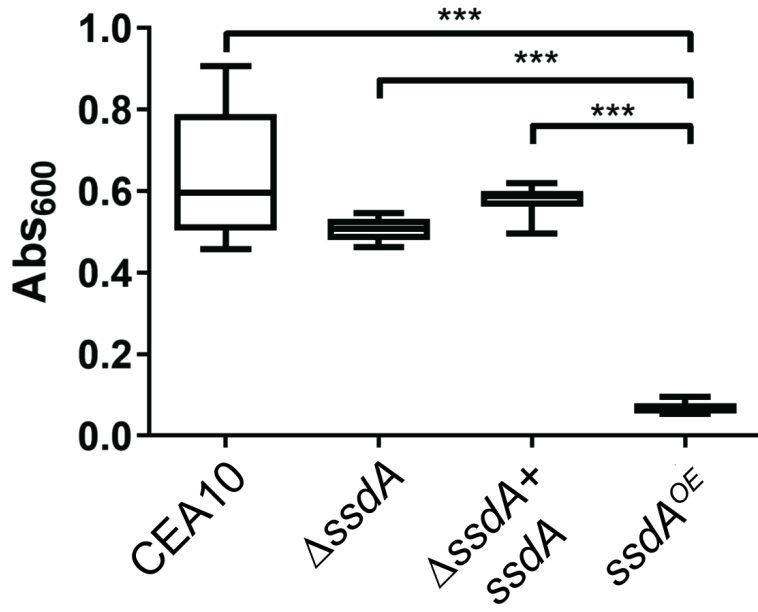

C.

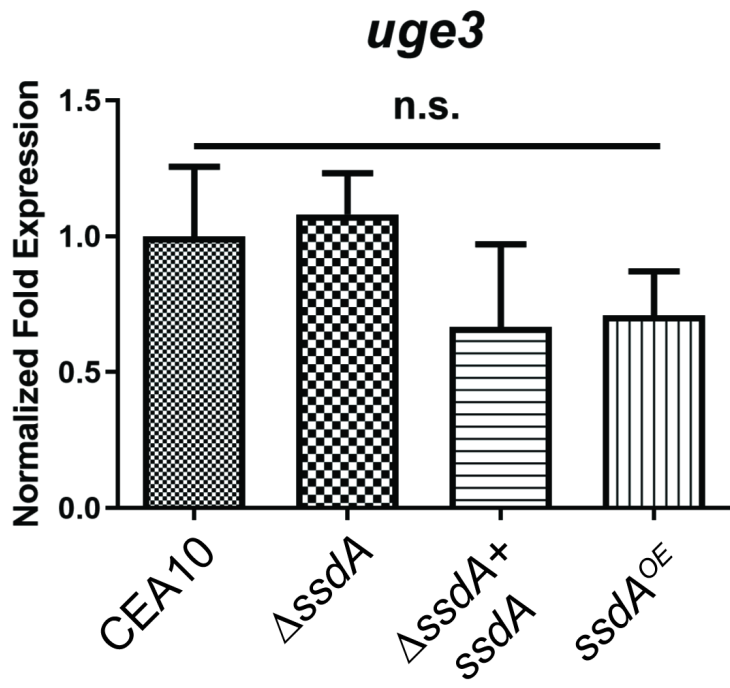

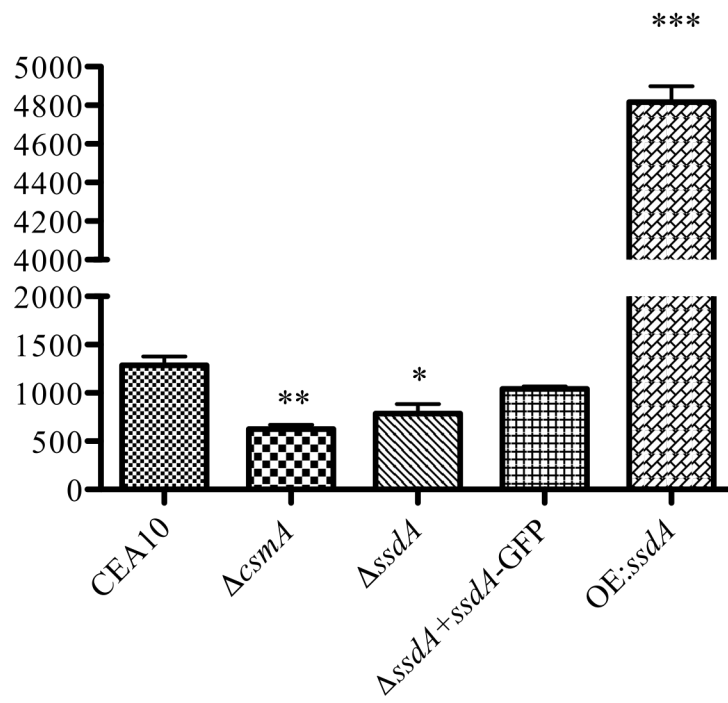

DIC

GFP

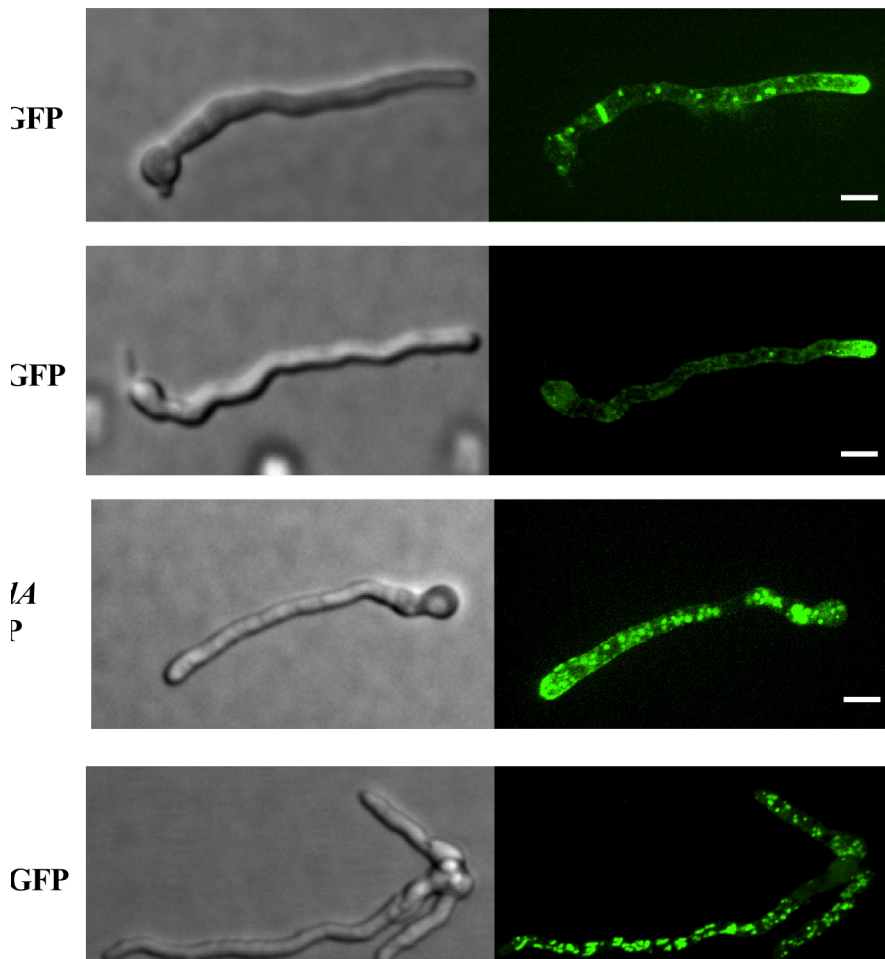



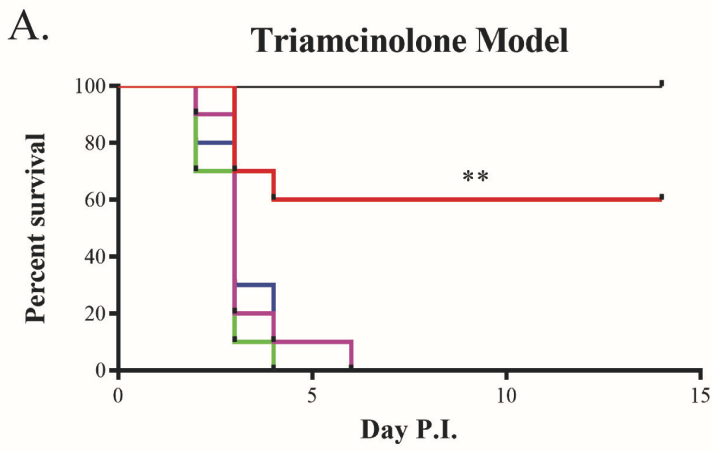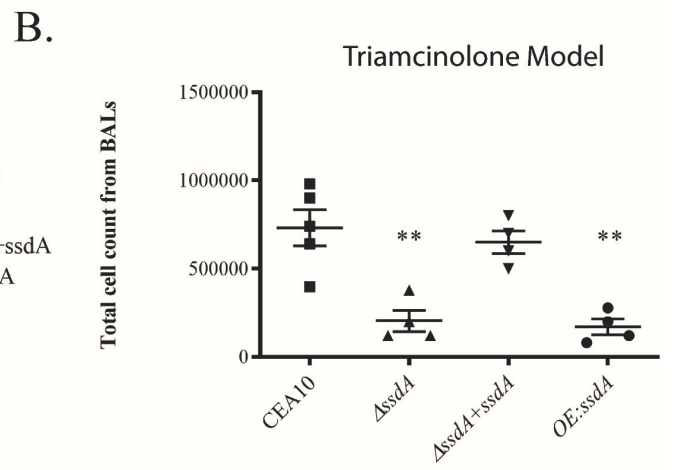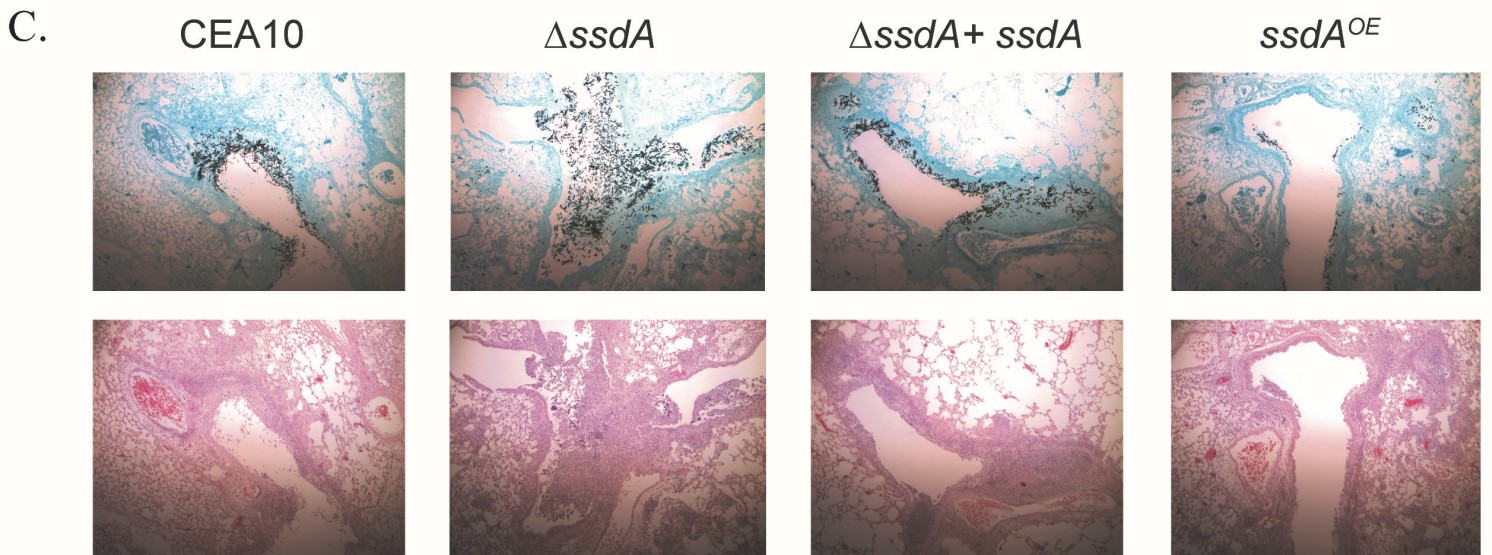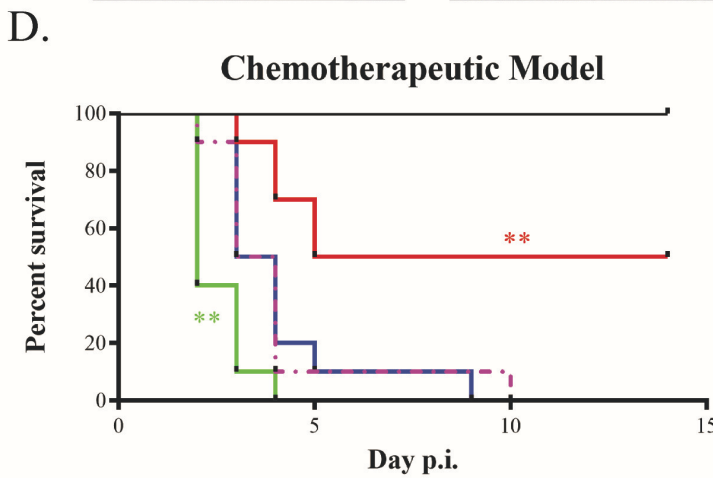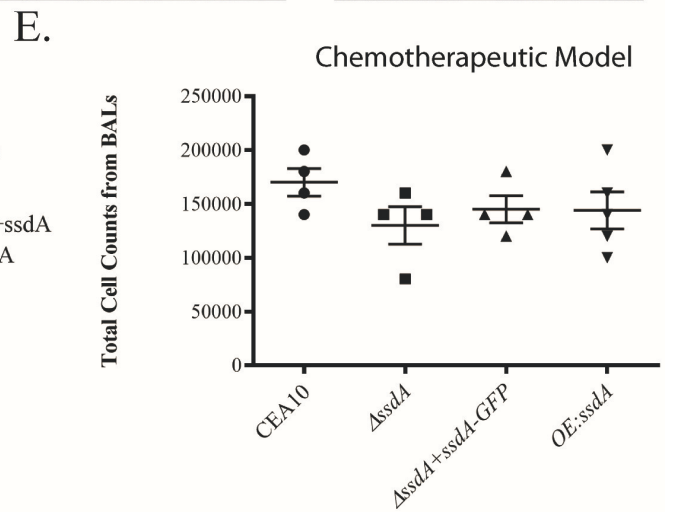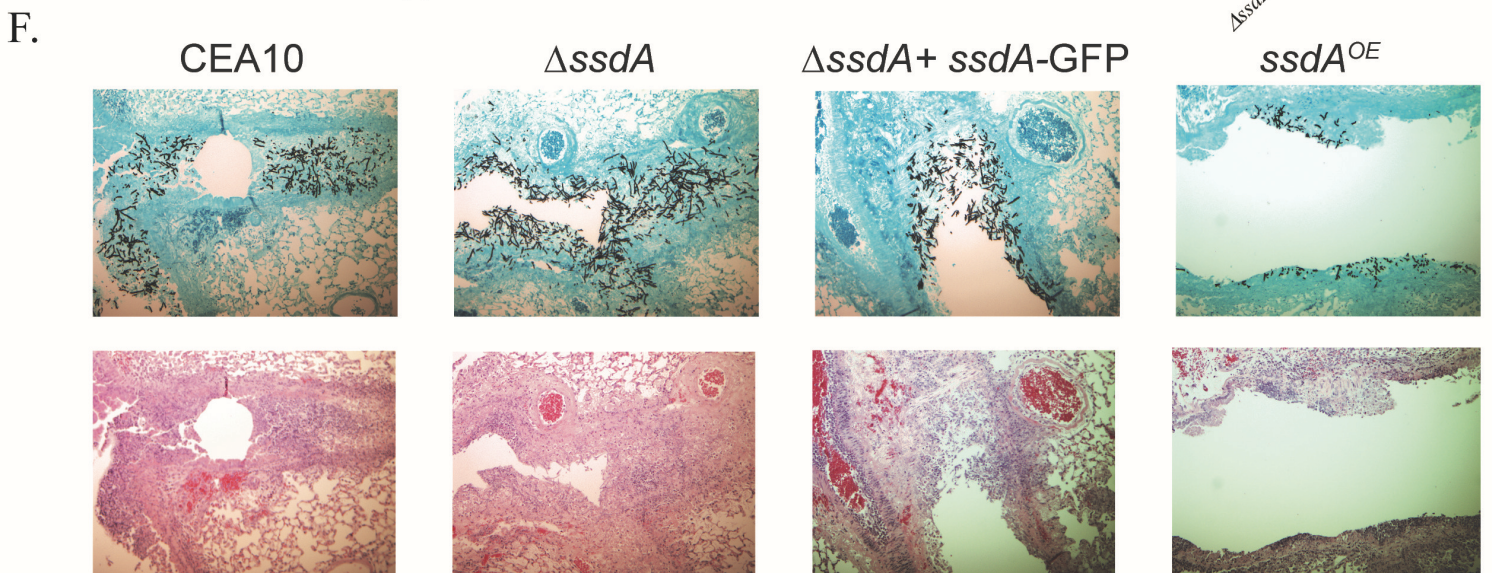

Source: https://www.biorxiv.org/content/10.1101/594341v1.full.pdf
